# Supplementary material for: Solvent effects on halogen bond symmetry
Source: Royal Society of Chemistry journal article supplement (doi:10.1039/c2ce26745d), 2012-11-28
Supplement: c2ce26745d.pdf [file c2ce26745d.pdf]

## Electronic Supplementary Information

### Solvent effects on halogen bond symmetry

Anna-Carin C. Carlsson, Martin Uhrbom, Alavi Karim, Ulrika Brath, Jürgen Gräfenstein and Máté Erdélyi\*

*Department of Chemistry and Molecular Biology and the Swedish NMR Centre, University of Gothenburg, Kemivägen 10, SE-412 96 Gothenburg, Sweden. E-mail: mate@chem.gu.se*

## Table of Contents

|                                                                                                |            |
|------------------------------------------------------------------------------------------------|------------|
| <b>1 Synthesis of [N-X-N]<sup>+</sup> OTf Complexes</b>                                        | <b>S3</b>  |
| 1.1 General Information                                                                        | S3         |
| 1.2 Bis(pyridine)bromonium triflate ( <b>1-d<sub>0</sub>/1-d<sub>1</sub></b> )                 | S4         |
| 1.3 Bis(pyridine)iodonium triflate ( <b>2-d<sub>0</sub>/2-d<sub>1</sub></b> )                  | S4         |
| 1.4 Pyridine-pyridinium triflate ( <b>3-d<sub>0</sub>/3-d<sub>1</sub></b> )                    | S5         |
| <b>2 IPE NMR Experiments</b>                                                                   | <b>S7</b>  |
| 2.1 General Experimental Information                                                           | S7         |
| 2.2 <sup>1</sup> H and <sup>13</sup> C NMR Spectra in CD <sub>3</sub> CN                       | S8         |
| 2.3 <sup>13</sup> C NMR Chemical Shifts, Observed Isotope Shifts, and Temperature Coefficients | S12        |
| <b>3 Computational Details: Geometry Optimization and Thermochemistry</b>                      | <b>S20</b> |
| 3.1 Equilibrium Geometries and Selected Charges                                                | S21        |
| 3.2 Cartesian Coordinates, Thermochemistry Data, and Selected Vibrational Frequencies          | S22        |
| 3.2.1 Acetonitrile                                                                             | S23        |
| 3.2.2 Dichloromethane                                                                          | S31        |

# 1 Synthesis of [N-X-N]<sup>+</sup> OTf Complexes

## 1.1 General Information

Unless otherwise stated, all reagents and solvent were purchased from commercial suppliers. CH<sub>2</sub>Cl<sub>2</sub> was freshly distilled from CaH<sub>2</sub>, and *n*-hexane was distilled from sodium metal/benzophenone ketyl prior to use. Pyridine was stored over KOH, and distilled from CaH<sub>2</sub>. Pyridine-2-*d*<sub>1</sub> was supplied by QMX Laboratories. All glassware was dried at 150 °C in a heating oven overnight or at least for several hours prior to use and all reactions were performed under dry conditions using dry solvents, and under nitrogen or argon atmosphere. Centrifugations were carried out with a Heraeus Christ Labofuge A centrifuge. Melting points were recorded on a Büchi B-545 apparatus and are uncorrected. <sup>1</sup>H NMR (500 MHz) and <sup>13</sup>C NMR (125 MHz) spectra were recorded on a Varian VNMR-S 500 spectrometer at 25 °C in CD<sub>2</sub>Cl<sub>2</sub> and CD<sub>3</sub>CN. Chemical shifts are reported on the δ scale in ppm using residual solvent signal as internal standard; CD<sub>3</sub>CN (δ<sub>H</sub> 1.94, δ<sub>C</sub> 118.26) and CD<sub>2</sub>Cl<sub>2</sub> (δ<sub>H</sub> 5.32, δ<sub>C</sub> 54.00). For the <sup>19</sup>F NMR spectra, a sealed capillary filled with hexafluorobenzene (δ<sub>F</sub> -164.4) was used as an internal standard. The numbering used for NMR assignment is shown in Fig. 3 in the main text. Diffusion NMR measurements were performed on a Varian 500 MHz VNMR-S spectrometer using the ONE-SHOT pulse sequence<sup>1</sup> as implemented in the software VNMRJ version 3.2. Four scans were acquired using 60 s relaxation delay (d1), 2 ms diffusion-encoding/decoding gradient pulse duration and 25 ms diffusion delay. The z-gradient strengths were varied in 14 steps between 0 and 60 G/cm. Gradient strength was calibrated for the known diffusion coefficient of the residual water signal of a DMSO-*d*<sub>6</sub> sample.<sup>2</sup> Nitrogen chemical shifts were acquired using <sup>1</sup>H, <sup>15</sup>N-gHMBCAD pulse sequence<sup>3</sup> on a 400 MHz Varian-MR spectrometer equipped with a OneNMR probe. Chemical shifts were referenced to nitromethane at 0 ppm (capillary).

High resolution mass spectroscopy (HRMS) data were obtained on a Q-TOF-MS at Stenhagen Analyslab AB, Gothenburg, Sweden, with detection in the positive ion mode. Standard autotune of masses was performed in the TOF-MS instruments before the experimental runs, and typical mass errors of 1-3 ppm were achieved in the calibration. The syntheses of [N-X-N]<sup>+</sup> OTf complexes **1** and **2** followed a previously published protocol.<sup>4</sup>

<sup>1</sup> Pelta, M. D., Morris, G. A., Stchedroff, J., Hammond, S. J. *Magn. Reson. Chem.*, 2002, **40**, S147.

<sup>2</sup> Packer, K. J., Tomlinson, D. J. *Trans. Faraday. Soc.*, 1971, **67**, 1302.

<sup>3</sup> (a) Bax, A., Summers, M. F. *J. Am. Chem. Soc.*, 1986, **108**, 2093. (b) Hurd, R. E., *J. Magn. Reson.*, 1990, **87**, 422. (c) Hadden, C. E., *Magn. Reson. Chem.*, 2005, **43**, 330.

<sup>4</sup> Carlsson, A.-C.C.; Gräfenstein, J.; Laurila, J. L.; Bergquist, J.; Erdélyi, M. *Chem. Commun.*, 2012, **48**, 1458.

## 1.2 Bis(pyridine)bromonium triflate (**1-d<sub>0</sub>**/**1-d<sub>1</sub>**)

Pyridine (150  $\mu\text{L}$ , 1.86 mmol), pyridine-2-*d*<sub>1</sub> (150  $\mu\text{L}$ , 1.84 mmol), and silver triflate (453 mg, 1.76 mmol) were suspended in dry  $\text{CH}_2\text{Cl}_2$  (6.0 mL) in a dried 20-mL vial sealed with a rubber septum (Biotage<sup>®</sup> high precision microwave vial) under stirring at room temperature below a nitrogen or argon atmosphere. When all solids were dissolved, and the mixture turned clear and colourless, a solution of bromine (0.58 M, 3.0 mL, 1.74 mmol) in dry  $\text{CH}_2\text{Cl}_2$  was added dropwise using a syringe. Immediately, light yellow silver bromide precipitated. The reaction mixture was stirred vigorously for 15 min. The vial was then centrifuged for 7 min at 2000 rpm. The resulting yellow supernatant was transferred to another 20-mL vial, sealed with a rubber septum, and kept under nitrogen. Addition of dry *n*-hexane (12.0 mL) resulted in a light yellow precipitate. Precipitation was continued on an ice-bath for 50 min under nitrogen. Subsequently, the vial was centrifuged for 7 min at 2000 rpm. The supernatant was removed, and the remaining solid was washed twice with dry *n*-hexane (2 x 6.0 mL). Each washing step was followed by centrifugation for 7 min at 2000 rpm, and removal of the supernatant. After drying under vacuum, an isotopologue mixture of  $[\text{N-Br-N}]^+$  complexes **1-d<sub>0</sub>** and **1-d<sub>1</sub>** (and **1-d<sub>2</sub>**) was furnished as a white, crystalline solid (614 mg, 90 %). Complexes **1-d<sub>0</sub>** and **1-d<sub>1</sub>** were obtained in an approximate ratio of 1:1.

<sup>1</sup>H NMR (500 MHz,  $\text{CD}_2\text{Cl}_2$ )  $\delta$  8.73-8.76 (m, 3H, H-2, H-2', H-6 and H-6'), 8.21-8.26 (m, 2H, H-4 and H-4'), 7.72-7.78 (m, 4H, H-3, H-3', H-5 and H-5') (lit.<sup>2</sup> for **1-d<sub>0</sub>**);

<sup>1</sup>H NMR (500 MHz,  $\text{CD}_3\text{CN}$ )  $\delta$  8.71-8.74 (m, 3H, H-2, H-2', H-6 and H-6'), 8.24-8.29 (m, 2H, H-4 and H-4'), 7.72-7.77 (m, 4H, H-3, H-3', H-5 and H-5');

<sup>13</sup>C NMR (125 MHz,  $\text{CD}_2\text{Cl}_2$ )  $\delta$  146.9 (C-2, C-6 and C-6'), 146.6 (t,  $J = 29.3$  Hz, C-6'), 142.7 (C-4 and C-4'), 128.2 (C-3, C-5 and C-5'), 128.1, (C-3'), 121.6 (q,  $J = 321.1$  Hz,  $\text{CF}_3$ );

<sup>13</sup>C NMR (125 MHz,  $\text{CD}_3\text{CN}$ )  $\delta$  147.5 (C-2 and C-6), 147.4 (C-6'), 147.2 (t,  $J = 28.5$  Hz, C-2'), 143.31 (C-4'), 143.29 (C-4), 128.7 (C-3, C-5 and C-5'), 128.6, (C-3'), 122.1 (q,  $J = 321$  Hz,  $\text{CF}_3$ );

<sup>19</sup>F NMR (376 MHz,  $\text{CD}_2\text{Cl}_2$ )  $\delta$  -77.27 (s,  $\text{CF}_3$ ); mp 89 – 93 °C (lit.<sup>5</sup> for **1-d<sub>0</sub>** 87-89 °C).<sup>2</sup>

## 1.3 Bis(pyridine)iodonium triflate (**2-d<sub>0</sub>**/**2-d<sub>1</sub>**)

Pyridine (200  $\mu\text{L}$ , 2.48 mmol), pyridine-2-*d*<sub>1</sub> (100  $\mu\text{L}$ , 1.22 mmol), and silver triflate (460 mg, 1.79 mmol) were suspended in dry  $\text{CH}_2\text{Cl}_2$  (7.0 mL) in a 20-mL vial (Biotage<sup>®</sup> high precision microwave vial), which was sealed with a rubber septum, under stirring at room temperature under nitrogen atmosphere. When all solids were dissolved a solution of iodine (457 mg, 1.80 mmol) in dry  $\text{CH}_2\text{Cl}_2$  (8.0 mL) was added dropwise by syringe to the clear and colourless mixture. Immediately upon the addition, yellow silver iodide was precipitated. The reaction mixture was stirred vigorously for 15

<sup>5</sup> A. A. Neverov, H. X. Feng, K. Hamilton and R. S. Brown, Brown, *J. Org. Chem.*, 2003, **68**, 3802.

min. Thereafter, the vial was centrifuged for 10 min at 2000 rpm. The resulting orange supernatant was transferred to a round-bottomed flask, and concentrated under reduced pressure. The remaining orange solid was re-dissolved in dry  $\text{CH}_2\text{Cl}_2$  (4.0 mL), and transferred to another 20-mL vial that was sealed with a rubber septum, and kept under nitrogen. Addition of dry *n*-hexane (18 mL) to the dark, orange solution resulted in formation of a yellow precipitate. Precipitation was continued on an ice-bath for 2 h under nitrogen. Subsequently, the vial was centrifuged for 10 min at 2000 rpm. The red supernatant was removed, and the remaining solid was washed twice with dry *n*-hexane (2 x 12.0 mL). After drying under vacuum, an isotopologue mixture of  $[\text{N-I-N}]^+$  complexes **2-d<sub>0</sub>** and **2-d<sub>1</sub>** (and **2-d<sub>2</sub>**) was furnished as a beige, crystalline solid (631 mg, 81 %). Complexes **2-d<sub>0</sub>** and **2-d<sub>1</sub>** were obtained in an approximate ratio of 2:1.

$^1\text{H}$  NMR (500 MHz,  $\text{CD}_2\text{Cl}_2$ )  $\delta$  8.78-8.81 (m, 3.5H, H-2, H-2', H-6 and H-6'), 8.20-8.25 (m, 2H, H-4 and H-4'), 7.62-7.66 (m, 4H, H-3, H-3', H-5 and H-5');

$^1\text{H}$  NMR (500 MHz,  $\text{CD}_3\text{CN}$ )  $\delta$  8.74-8.83 (m, 3.5H, H-2, H-2', H-6 and H-6'), 8.21-8.29 (m, 2H, H-4 and H-4'), 7.58-7.68 (m, 4H, H-3, H-3', H-5 and H-5');

$^{13}\text{C}$  NMR (125 MHz,  $\text{CD}_2\text{Cl}_2$ )  $\delta$  150.06 (C-2 and C-6), 150.03 (C-6'), 149.73 (t,  $J = 29.3$  Hz, C-2'), 142.68 (C-4'), 142.66 (C-4), 128.49 (C-3, C-5 and C-5'), 128.34 (C-3'), 121.54 (q,  $J = 320.7$  Hz,  $\text{CF}_3$ );

$^{13}\text{C}$  NMR (125 MHz,  $\text{CD}_3\text{CN}$ , inverse gated  $^2\text{H}$  decoupling)  $\delta$  150.64 (C-2 and C-6), 150.61 (C-6'), 150.3 (C-2'), 143.21 (C-4'), 143.21 (C-4), 128.8 (C-3, C-5 and C-5'), 128.7, (C-3'), 122.1 (q,  $J = 321$  Hz,  $\text{CF}_3$ );

$^{19}\text{F}$  NMR (376 MHz,  $\text{CD}_2\text{Cl}_2$ )  $\delta$  -77.24 (s,  $\text{CF}_3$ ); HRMS calcd for  $(\text{C}_{10}\text{H}_{10}\text{N}_2\text{INa})^+$   $m/z$  307.9786, found 307.9873; mp 84 – 88 °C.

#### 1.4 Pyridine-pyridinium triflate (**3-d<sub>0</sub>/3-d<sub>1</sub>**)

The **3-d<sub>0</sub>/3-d<sub>1</sub>** sample was prepared by mixing pyridine, pyridine-2-*d*<sub>1</sub>, and trifluoromethanesulfonic acid in  $\text{CD}_2\text{Cl}_2$  or  $\text{CD}_3\text{CN}$ , adjusting the  $^{13}\text{C}$  chemical shifts until the mixture contained pyridine/TfOH in an approximate 2:1 ratio, based on a previous titration of pyridine with TfOH in  $\text{CD}_2\text{Cl}_2$  or  $\text{CD}_3\text{CN}$  at 25 °C.

$^1\text{H}$  NMR (500 MHz,  $\text{CD}_2\text{Cl}_2$ )  $\delta$  8.70-8.74 (m, 3.5H, H-2, H-2', H-6 and H-6'), 8.10-8.15 (m, 2H, H-4 and H-4'), 7.66-7.70 (m, 4H, H-3, H-3', H-5 and H-5');

$^1\text{H}$  NMR (500 MHz,  $\text{CD}_3\text{CN}$ )  $\delta$  8.61-8.66 (m, 3H, H-2, H-2', H-6 and H-6'), 8.11-8.17 (m, 2H, H-4 and H-4'), 7.64-7.69 (m, 4H, H-3, H-3', H-5 and H-5');

$^{13}\text{C}$  NMR (125 MHz,  $\text{CD}_2\text{Cl}_2$ )  $\delta$  146.30 (C-2 and C-6), 146.25 (C-6'), 145.97 (t,  $J = 28.3$  Hz, C-2'), 141.92 (C-4'), 141.87 (C-4), 126.26 (C-5'), 126.24 (C-3 and C-5), 126.11 (C-3'), 121.05 (q,  $J = 319.4$  Hz,  $\text{CF}_3$ ).

$^{13}\text{C}$  NMR (125 MHz,  $\text{CD}_3\text{CN}$ , inverse gated  $^2\text{H}$  decoupling)  $\delta$  146.8 (C-2 and C-6), 146.7 (C-6'), 146.4 (C-2'), 142.54 (C-4'), 142.49 (C-4), 126.62 (C-5'), 126.60 (C-3 and C-5), 126.5 (C-3'), 121.9 (q,  $J = 321$  Hz,  $\text{CF}_3$ ).

## 2 IPE NMR Experiments

### 2.1 General Experimental Information

Isotopic perturbation of equilibrium (IPE) NMR experiments were recorded on a Varian VNMR-S 500 MHz spectrometer equipped with an X{HF} probe using  $^{13}\text{C}$  detection with simultaneous broadband  $^1\text{H}$  and inverse-gated  $^2\text{H}$  decoupling. Dry NMR samples were prepared using pre-dried  $\text{CD}_3\text{CN}$ , by storing the solvent over molecular sieves overnight followed by ultrasonication in the presence of  $\text{CaH}_2$  for one hour;  $\text{CaH}_2$  was subsequently removed by ultracentrifugation. The NMR tubes were dried under high vacuum for several hours before use. Spectra of mixtures of the nondeuterated and monodeuterated compounds **1- $d_0$ /1- $d_1$** , **2- $d_0$ /2- $d_1$** , **3- $d_0$ /3- $d_1$**  and pyridine- $d_0$ /pyridine- $d_1$ , were recorded for  $\text{CD}_2\text{Cl}_2$  solutions as described earlier,<sup>4</sup> and for  $\text{CD}_3\text{CN}$  solutions for the temperature interval -30 to +70 °C. To obtain high quality spectra for determination of small variations in isotopic shifts ( $^n\Delta_{\text{obs}}$ )  $^{13}\text{C}$  spectra have been recorded with 32768 points and were zero-filled to 262144 points for processing. The spectral quality and the estimated chemical shift uncertainty are discussed in detail in the ESI of reference 4. The pyridine- $d_0$ /pyridine- $d_1$  sample consisted of a mixture of pyridine with pyridine-2- $d_1$ , the nondeuterated compound being in excess. Supplemented NMR spectra ( $^1\text{H}$  and  $^{13}\text{C}$  with  $^2\text{H}$  decoupling, section 2.2) were recorded at 25°C.

## 2.2 $^1\text{H}$ and $^{13}\text{C}$ NMR Spectra in $\text{CD}_3\text{CN}$

The  $^1\text{H}$  and  $^{13}\text{C}$  NMR spectra of the compounds obtained for  $\text{CD}_2\text{Cl}_2$  solutions are given in reference 4.

### 2.2.1 Bis(pyridine)bromonium triflate ( $1-d_0/1-d_1$ )

#### $^1\text{H}$ NMR spectrum (500 MHz, $\text{CD}_3\text{CN}$ )

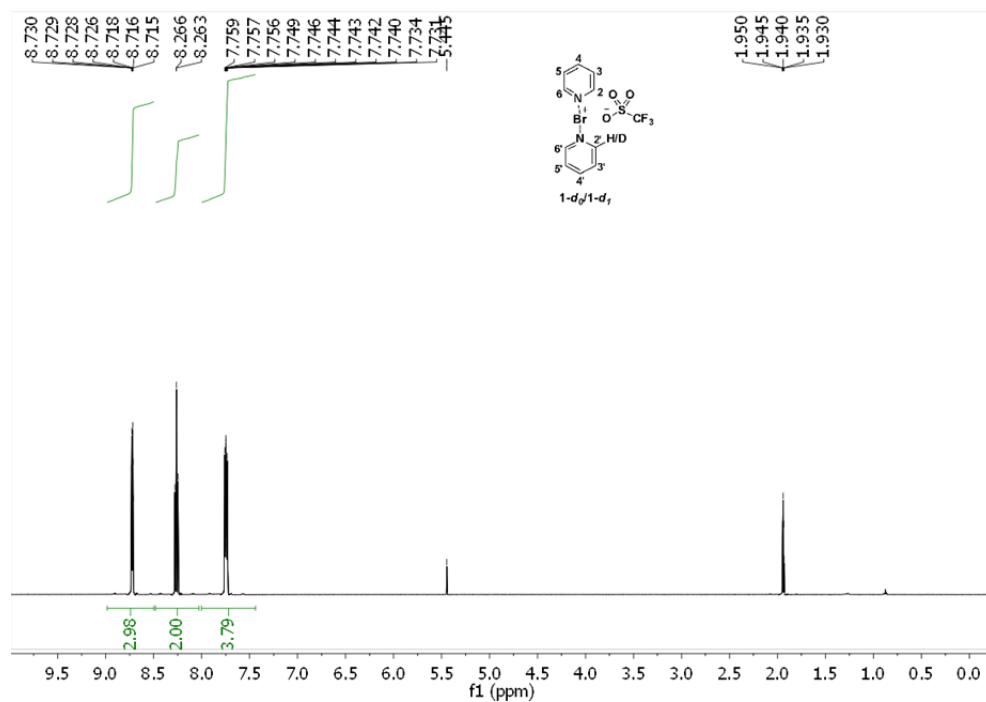

#### $^{13}\text{C}$ NMR spectrum (125 MHz, $\text{CD}_3\text{CN}$ , inverse gated $^2\text{H}$ decoupling)

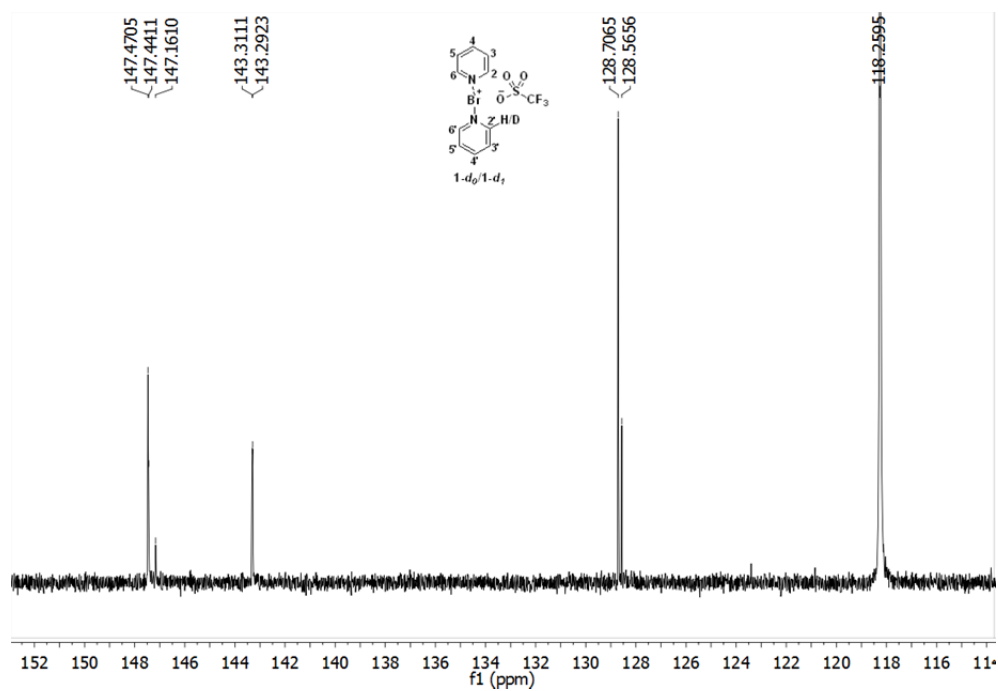



### 2.2.2 Bis(pyridine)iodonium triflate (2-d<sub>0</sub>/2-d<sub>1</sub>)

<sup>1</sup>H NMR spectrum (500 MHz, CD<sub>3</sub>CN)

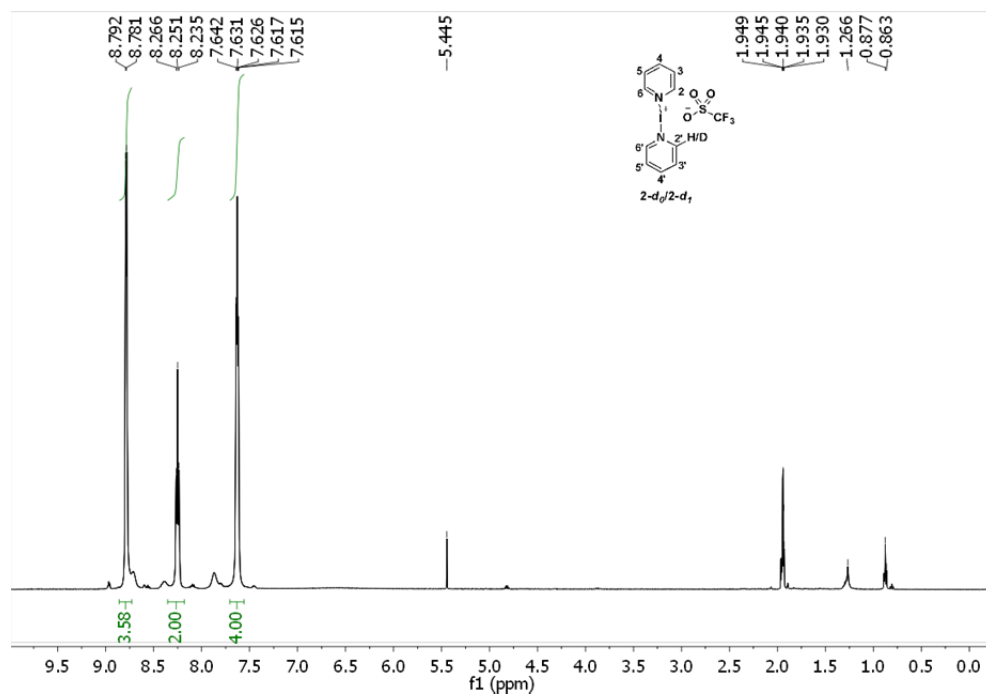

<sup>13</sup>C NMR spectrum (125 MHz, CD<sub>3</sub>CN, inverse gated <sup>2</sup>H decoupling)

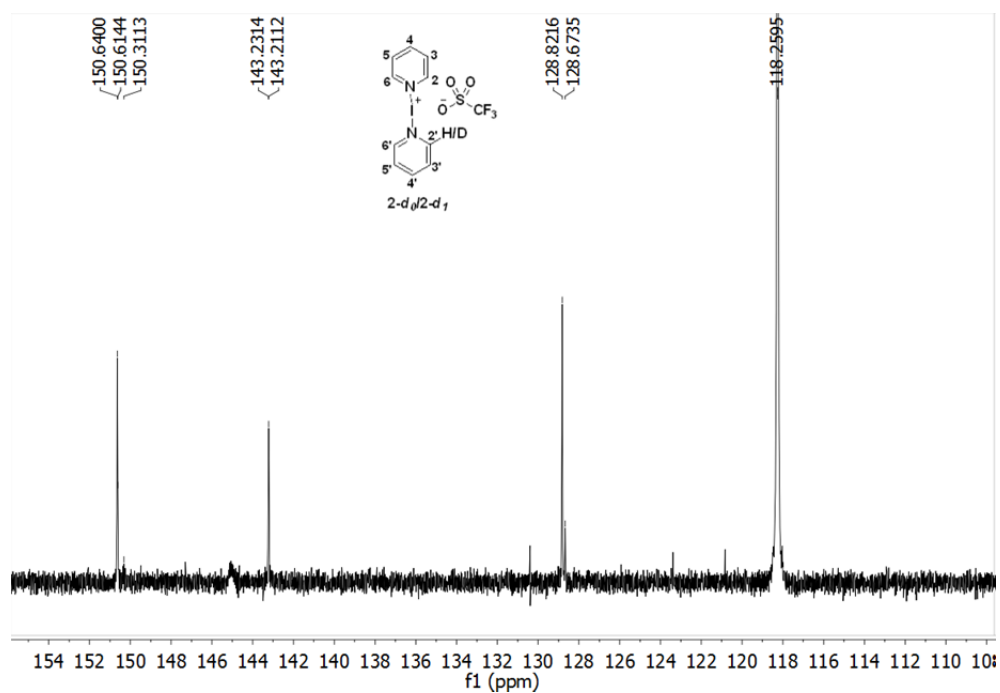

### 2.2.3 Pyridine-pyridinium triflate (3-d<sub>0</sub>/3-d<sub>1</sub>)

<sup>1</sup>H NMR spectrum (500 MHz, CD<sub>3</sub>CN)

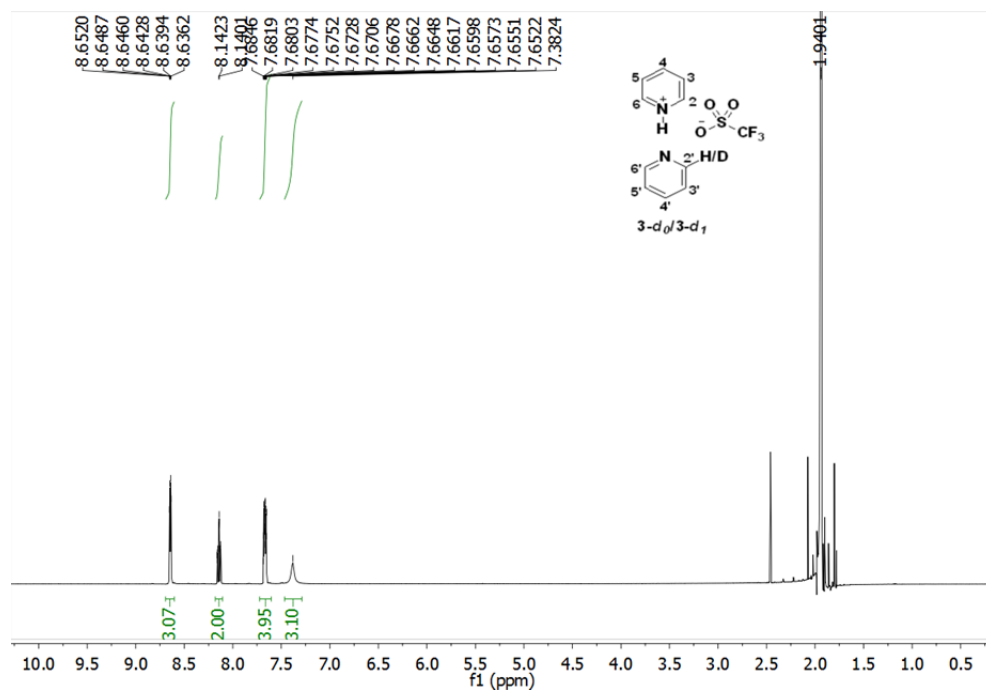

<sup>13</sup>C NMR spectrum (125 MHz, CD<sub>3</sub>CN, inverse gated <sup>2</sup>H decoupling)

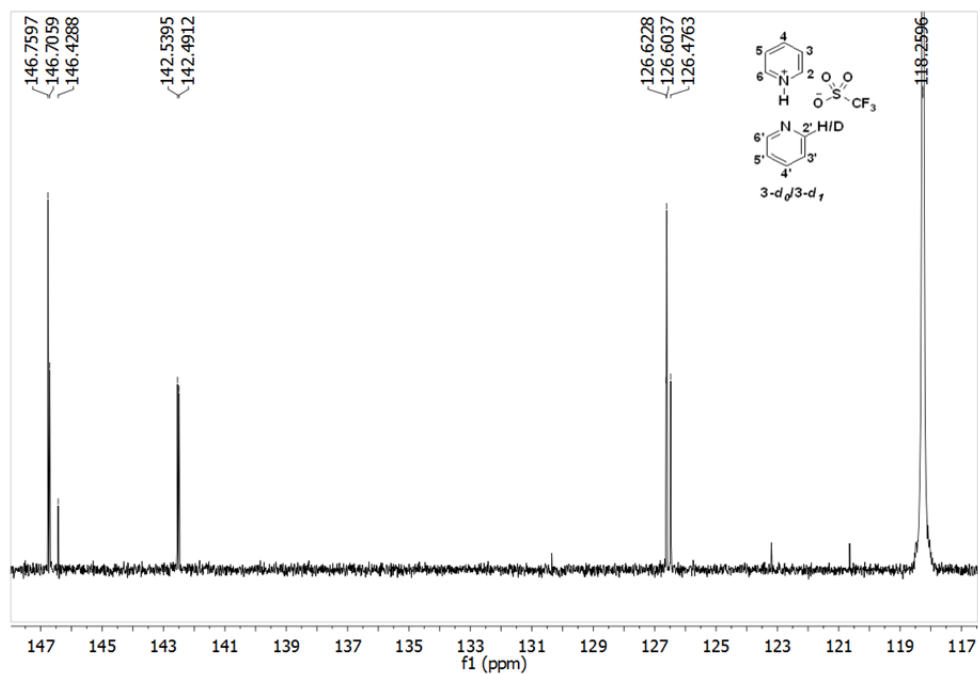

### 2.2.4 Pyridine-*d*<sub>0</sub>/Pyridine-*d*<sub>1</sub>

<sup>1</sup>H NMR spectrum (500 MHz, CD<sub>3</sub>CN)

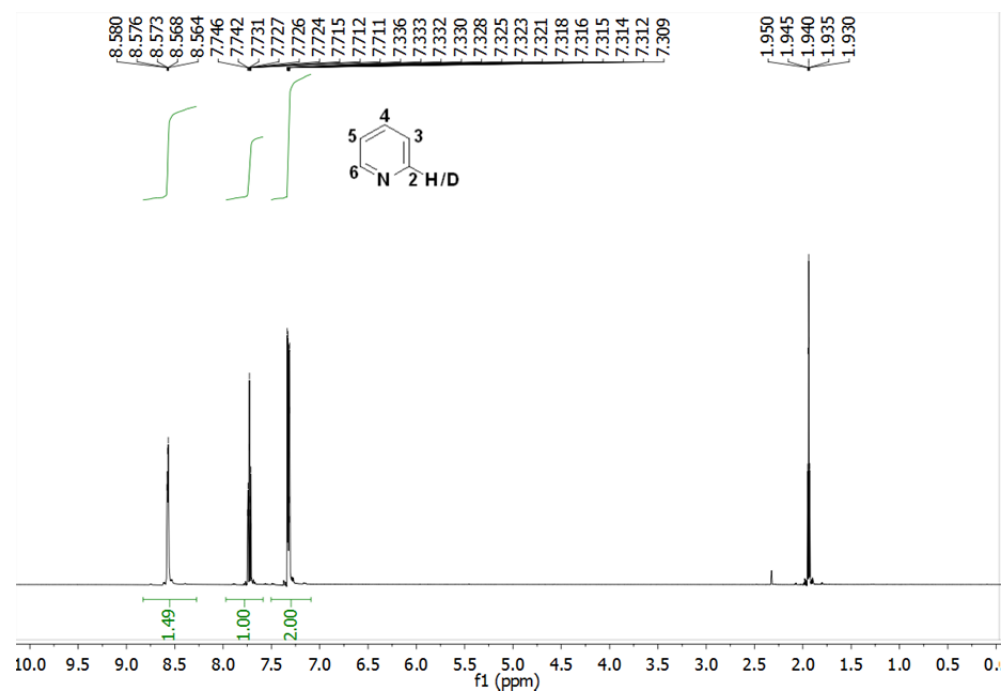

<sup>13</sup>C NMR spectrum (125 MHz, CD<sub>3</sub>CN, inverse gated <sup>2</sup>H decoupling)

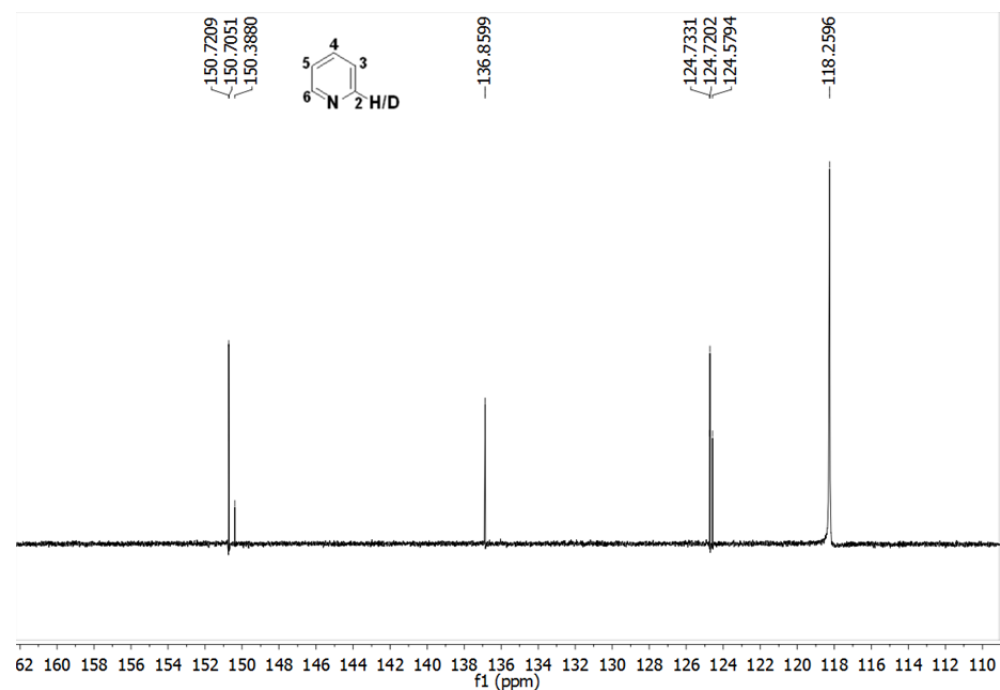

### 2.3. $^{13}\text{C}$ NMR Chemical Shifts, Observed Isotope Shift, and Temperature Coefficients

#### *Bis(pyridine)bromonium triflate (1- $d_0$ /1- $d_1$ )*

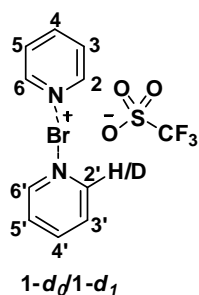

**Table S1.** The chemical shifts of bis(pyridine)bromonium triflate (1- $d_0$ /1- $d_1$ ) given in ppm.

| Temp.<br>(°C) | $\delta$<br>C2 <sub>H,6H</sub> | $\delta$<br>C6 <sub>D</sub> | $\delta$<br>C2 <sub>D</sub> | $\delta$<br>C4 <sub>H</sub> | $\delta$<br>C4 <sub>D</sub> | $\delta$<br>C3 <sub>H,5H</sub> | $\delta$<br>C5 <sub>D</sub> | $\delta$<br>C3 <sub>D</sub> |
|---------------|--------------------------------|-----------------------------|-----------------------------|-----------------------------|-----------------------------|--------------------------------|-----------------------------|-----------------------------|
| 70            | 147.9741                       | 147.9478                    | 147.6680                    | 143.6526                    | 143.6713                    | 129.0701                       | 129.0701                    | 128.9357                    |
| 50            | 147.7513                       | 147.7229                    | 147.4424                    | 143.4963                    | 143.5130                    | 128.9148                       | 128.9148                    | 128.7781                    |
| 25            | 147.4686                       | 147.4379                    | 147.1593                    | 143.2912                    | 143.3093                    | 128.7057                       | 128.7057                    | 128.5646                    |
| 0             | 147.2024                       | 147.1790                    | 146.8915                    | 143.0804                    | 143.0893                    | 128.4900                       | 128.4900                    | 128.3457                    |
| -20           | 147.0155                       | 146.9838                    | 146.7027                    | 142.8694                    | 142.8929                    | 128.3154                       | 128.3154                    | 128.1687                    |
| -25           | 146.9948                       | 146.9636                    | 146.6808                    | 142.8514                    | 142.8685                    | 128.3030                       | 128.3030                    | 128.1556                    |
| -30           | 146.9417                       | 146.9103                    | 146.6281                    | 142.8112                    | 142.8299                    | 128.2594                       | 128.2594                    | 128.1115                    |

**Table S2.** The temperature dependence of the isotope shifts observed for bis(pyridine)bromonium triflate (1- $d_0$ /1- $d_1$ ), given in ppm.

| Temp.<br>(°C) | $^1\Delta_{\text{obs}}$<br>$\delta_{\text{C2D}} - \delta_{\text{C2H}}$ | $^3\Delta_{\text{obs}}$<br>$\delta_{\text{C6D}} - \delta_{\text{C6H}}$ | $^3\Delta_{\text{obs}}$<br>$\delta_{\text{C4D}} - \delta_{\text{C4H}}$ | $^2\Delta_{\text{obs}}$<br>$\delta_{\text{C3D}} - \delta_{\text{C3H}}$ | $^4\Delta_{\text{obs}}$<br>$\delta_{\text{C5D}} - \delta_{\text{C5H}}$ |
|---------------|------------------------------------------------------------------------|------------------------------------------------------------------------|------------------------------------------------------------------------|------------------------------------------------------------------------|------------------------------------------------------------------------|
| 70            | -0.3061                                                                | -0.0263                                                                | 0.0187                                                                 | -0.1344                                                                | 0.0000                                                                 |
| 50            | -0.3089                                                                | -0.0284                                                                | 0.0167                                                                 | -0.1367                                                                | 0.0000                                                                 |
| 25            | -0.3093                                                                | -0.0307                                                                | 0.0181                                                                 | -0.1411                                                                | 0.0000                                                                 |
| 0             | -0.3109                                                                | -0.0234                                                                | 0.0089                                                                 | -0.1443                                                                | 0.0000                                                                 |
| -20           | -0.3128                                                                | -0.0317                                                                | 0.0235                                                                 | -0.1467                                                                | 0.0000                                                                 |
| -25           | -0.3140                                                                | -0.0312                                                                | 0.0171                                                                 | -0.1474                                                                | 0.0000                                                                 |
| -30           | -0.3136                                                                | -0.0314                                                                | 0.0187                                                                 | -0.1479                                                                | 0.0000                                                                 |

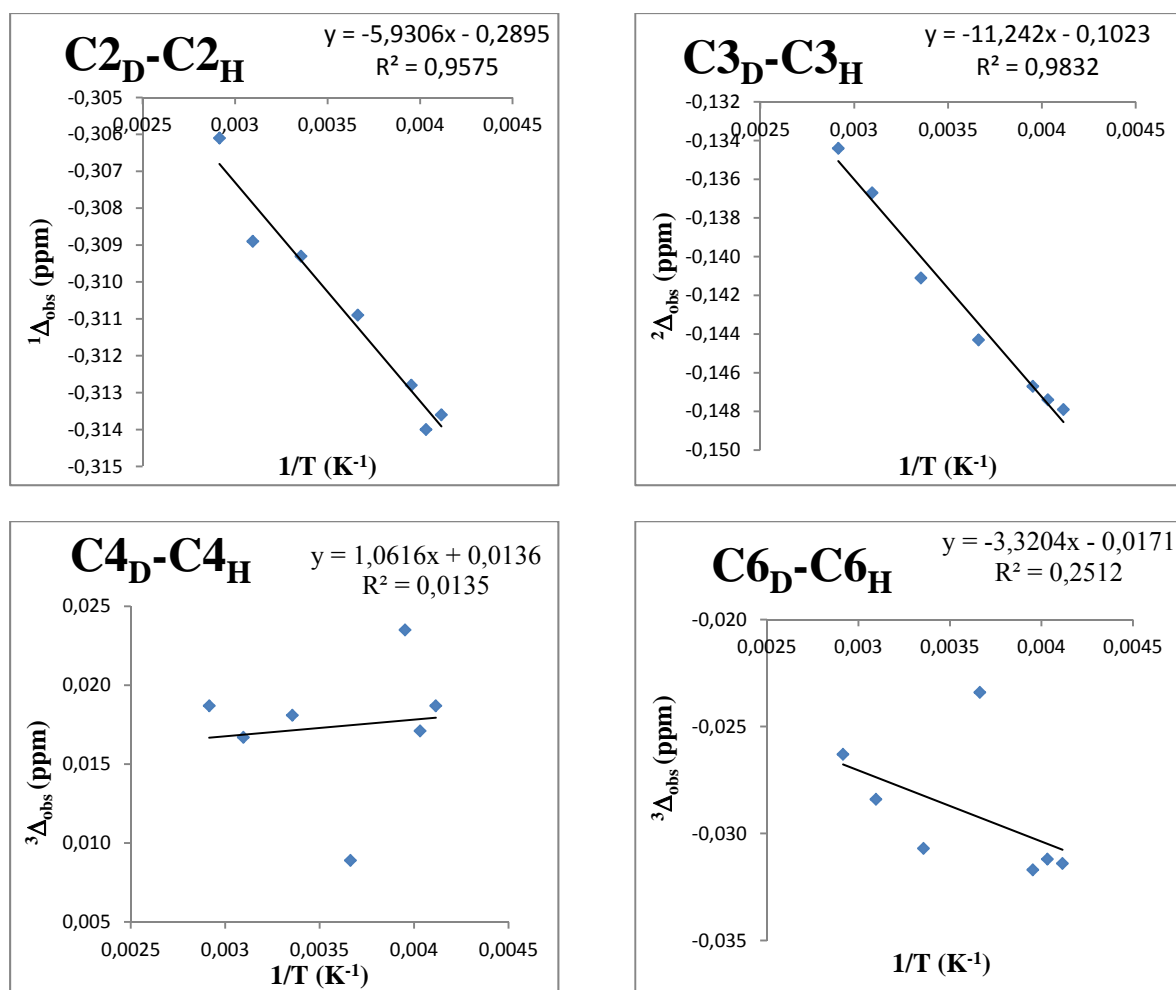

**Figure S3.** The temperature dependence of the isotope shifts of bis(pyridine)bromonium triflate ( $1-d_0/1-d_1$ ), shown for each carbon separately.

**Bis(pyridine)iodonium triflate (2-*d*<sub>0</sub>/2-*d*<sub>1</sub>)**

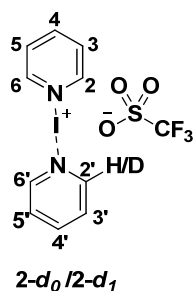

**Table S3.** The chemical shifts of bis(pyridine)iodonium triflate (2-*d*<sub>0</sub>/2-*d*<sub>1</sub>) given in ppm.

| Temp.<br>(°C) | $\delta$<br>C2 <sub>H,6H</sub> | $\delta$<br>C6 <sub>D</sub> | $\delta$<br>C2 <sub>D</sub> | $\delta$<br>C4 <sub>H</sub> | $\delta$<br>C4 <sub>D</sub> | $\delta$<br>C3 <sub>H,5H</sub> | $\delta$<br>C5 <sub>D</sub> | $\delta$<br>C3 <sub>D</sub> |
|---------------|--------------------------------|-----------------------------|-----------------------------|-----------------------------|-----------------------------|--------------------------------|-----------------------------|-----------------------------|
| 40            | 150.7854                       | 150.7211                    | 150.4587                    | 143.3353                    | 143.3524                    | 128.9446                       | 128.9446                    | 128.7988                    |
| 25            | 150.6400                       | 150.6144                    | 150.3113                    | 143.2112                    | 143.2314                    | 128.8216                       | 128.8216                    | 128.6735                    |
| 10            | 150.4790                       | 150.4495                    | 150.1466                    | 143.0813                    | 143.1022                    | 128.6829                       | 128.6829                    | 128.5330                    |
| 0             | 150.3740                       | 150.3435                    | 150.0401                    | 142.9986                    | 143.0188                    | 128.5920                       | 128.5920                    | 128.4413                    |
| -10           | 150.2692                       | 150.2386                    | 149.9340                    | 142.9162                    | 142.9378                    | 128.5004                       | 128.5004                    | 128.3485                    |
| -15           | 150.2150                       | 150.1838                    | 149.8798                    | 142.8740                    | 142.8959                    | 128.4527                       | 128.4527                    | 128.3002                    |
| -20           | 150.1627                       | 150.1318                    | 149.8272                    | 142.8334                    | 142.8551                    | 128.4058                       | 128.4058                    | 128.2527                    |
| -25           | 150.0816                       | 150.0500                    | 149.7466                    | 142.7641                    | 142.7860                    | 128.3317                       | 128.3317                    | 128.1779                    |
| -30           | 150.0528                       | 150.0213                    | 149.7171                    | 142.7470                    | 142.7685                    | 128.3089                       | 128.3089                    | 128.1547                    |

**Table S4.** The temperature dependence of the isotope shifts for bis(pyridine)iodonium triflate (2-*d*<sub>0</sub>/2-*d*<sub>1</sub>), given in ppm.

| Temp.<br>(°C) | $^1\Delta_{\text{obs}}$<br>$\delta_{\text{C2D}} - \delta_{\text{C2H}}$ | $^3\Delta_{\text{obs}}$<br>$\delta_{\text{C6D}} - \delta_{\text{C6H}}$ | $^3\Delta_{\text{obs}}$<br>$\delta_{\text{C4D}} - \delta_{\text{C4H}}$ | $^2\Delta_{\text{obs}}$<br>$\delta_{\text{C3D}} - \delta_{\text{C3H}}$ | $^4\Delta_{\text{obs}}$<br>$\delta_{\text{C5D}} - \delta_{\text{C5H}}$ |
|---------------|------------------------------------------------------------------------|------------------------------------------------------------------------|------------------------------------------------------------------------|------------------------------------------------------------------------|------------------------------------------------------------------------|
| 40            | -0.3267                                                                | -0.0643                                                                | 0.0171                                                                 | -0.1458                                                                | 0.0000                                                                 |
| 25            | -0.3287                                                                | -0.0256                                                                | 0.0202                                                                 | -0.1481                                                                | 0.0000                                                                 |
| 10            | -0.3324                                                                | -0.0295                                                                | 0.0209                                                                 | -0.1499                                                                | 0.0000                                                                 |
| 0             | -0.3339                                                                | -0.0305                                                                | 0.0202                                                                 | -0.1507                                                                | 0.0000                                                                 |
| -10           | -0.3352                                                                | -0.0306                                                                | 0.0216                                                                 | -0.1519                                                                | 0.0000                                                                 |
| -15           | -0.3352                                                                | -0.0312                                                                | 0.0219                                                                 | -0.1525                                                                | 0.0000                                                                 |
| -20           | -0.3355                                                                | -0.0309                                                                | 0.0217                                                                 | -0.1531                                                                | 0.0000                                                                 |
| -25           | -0.3350                                                                | -0.0316                                                                | 0.0219                                                                 | -0.1538                                                                | 0.0000                                                                 |
| -30           | -0.3357                                                                | -0.0315                                                                | 0.0215                                                                 | -0.1542                                                                | 0.0000                                                                 |

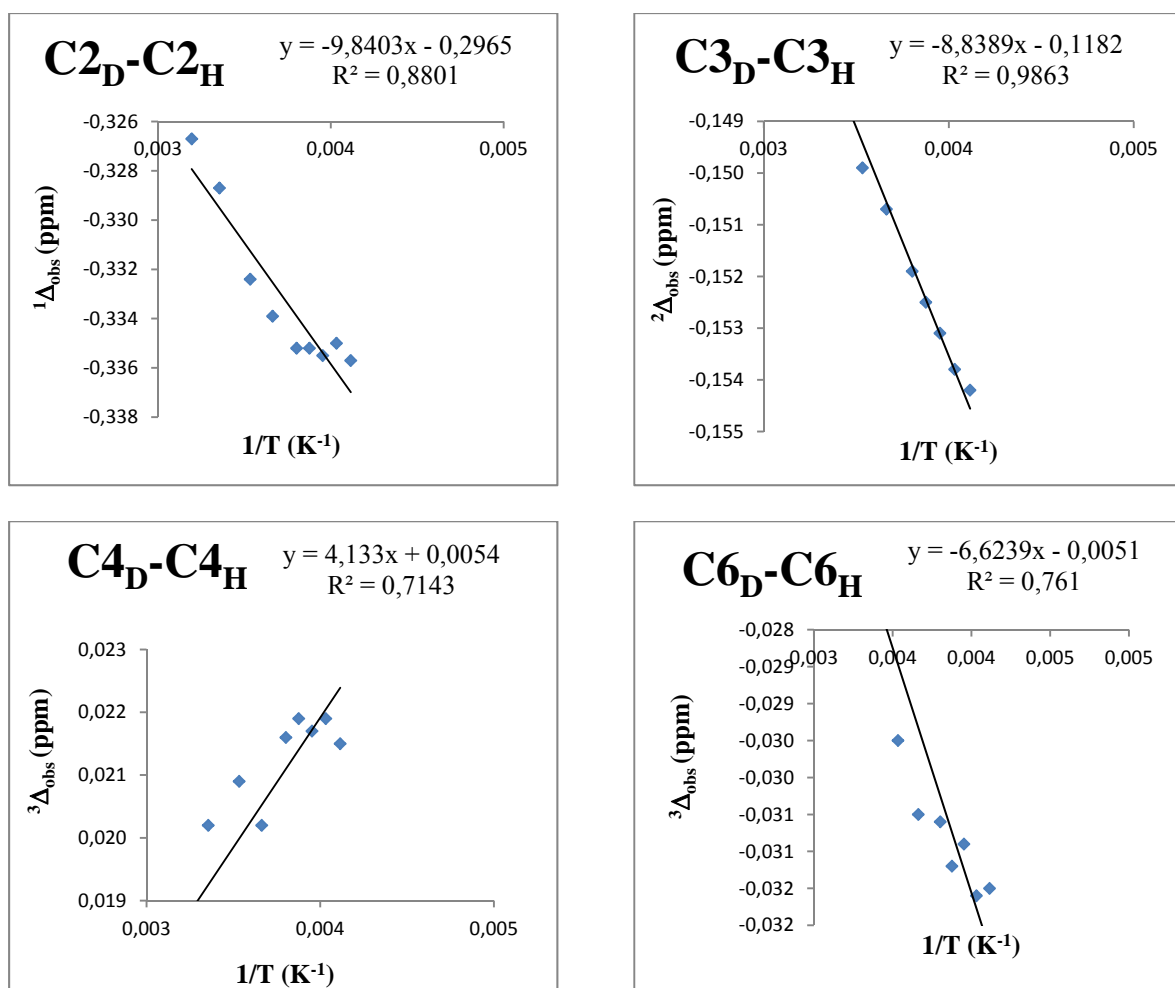

**Figure S4.** The temperature dependence of the isotope shifts of bis(pyridine)iodonium triflate (*2-d<sub>0</sub>/2-d<sub>1</sub>*), shown for each carbon separately.

**Pyridine-pyridinium triflate (3-*d*<sub>0</sub>/3-*d*<sub>1</sub>)**

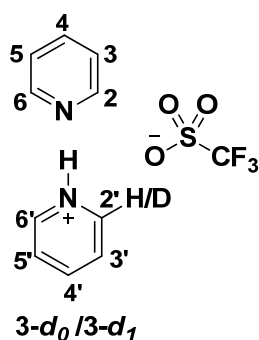

**Table S5.** The chemical shifts of pyridine-pyridinium triflate (3-*d*<sub>0</sub>/3-*d*<sub>1</sub>) given in ppm.

| Temp.<br>(°C) | $\delta$<br>C2 <sub>H,6H</sub> | $\delta$<br>C6 <sub>D</sub> | $\delta$<br>C2 <sub>D</sub> | $\delta$<br>C4 <sub>H</sub> | $\delta$<br>C4 <sub>D</sub> | $\delta$<br>C3 <sub>H,5H</sub> | $\delta$<br>C5 <sub>D</sub> | $\delta$<br>C3 <sub>D</sub> |
|---------------|--------------------------------|-----------------------------|-----------------------------|-----------------------------|-----------------------------|--------------------------------|-----------------------------|-----------------------------|
| 33            | 146.8613                       | 146.8082                    | 146.5317                    | 142.5409                    | 142.5887                    | 126.6766                       | 126.6958                    | 126.5502                    |
| 23            | 146.7597                       | 146.7059                    | 146.4288                    | 142.4912                    | 142.5395                    | 126.6037                       | 126.6228                    | 126.4763                    |
| -10           | 146.4109                       | 146.3562                    | 146.0798                    | 142.3611                    | 142.4085                    | 126.3763                       | 126.3951                    | 126.2446                    |
| -15           | 146.3509                       | 146.2960                    | 146.0198                    | 142.3466                    | 142.3935                    | 126.3416                       | 126.3602                    | 126.2093                    |
| -20           | 146.2883                       | 146.2336                    | 145.9579                    | 142.3326                    | 142.3795                    | 126.3063                       | 126.3245                    | 126.1732                    |
| -25           | 146.2213                       | 146.1664                    | 145.8900                    | 142.3189                    | 142.3653                    | 126.2689                       | 126.2874                    | 126.1362                    |
| -33           | 146.1606                       | 146.1056                    | 145.8299                    | 142.3076                    | 142.3538                    | 126.2358                       | 126.2539                    | 126.1011                    |

**Table S6.** The temperature dependence of the isotope shifts for pyridine-pyridinium triflate (3-*d*<sub>0</sub>/3-*d*<sub>1</sub>), given in ppm.

| Temp.<br>(°C) | $^1\Delta_{\text{obs}}$<br>$\delta_{\text{C2D}} - \delta_{\text{C2H}}$ | $^3\Delta_{\text{obs}}$<br>$\delta_{\text{C6D}} - \delta_{\text{C6H}}$ | $^3\Delta_{\text{obs}}$<br>$\delta_{\text{C4D}} - \delta_{\text{C4H}}$ | $^2\Delta_{\text{obs}}$<br>$\delta_{\text{C3D}} - \delta_{\text{C3H}}$ | $^4\Delta_{\text{obs}}$<br>$\delta_{\text{C5D}} - \delta_{\text{C5H}}$ |
|---------------|------------------------------------------------------------------------|------------------------------------------------------------------------|------------------------------------------------------------------------|------------------------------------------------------------------------|------------------------------------------------------------------------|
| 33            | -0.3296                                                                | -0.0531                                                                | 0.0478                                                                 | -0.1264                                                                | 0.0192                                                                 |
| 23            | -0.3309                                                                | -0.0538                                                                | 0.0483                                                                 | -0.1274                                                                | 0.0191                                                                 |
| -10           | -0.3311                                                                | -0.0547                                                                | 0.0474                                                                 | -0.1317                                                                | 0.0188                                                                 |
| -15           | -0.3311                                                                | -0.0549                                                                | 0.0469                                                                 | -0.1323                                                                | 0.0186                                                                 |
| -20           | -0.3304                                                                | -0.0547                                                                | 0.0469                                                                 | -0.1331                                                                | 0.0182                                                                 |
| -25           | -0.3313                                                                | -0.0549                                                                | 0.0464                                                                 | -0.1327                                                                | 0.0185                                                                 |
| -33           | -0.3307                                                                | -0.0550                                                                | 0.0462                                                                 | -0.1347                                                                | 0.0181                                                                 |



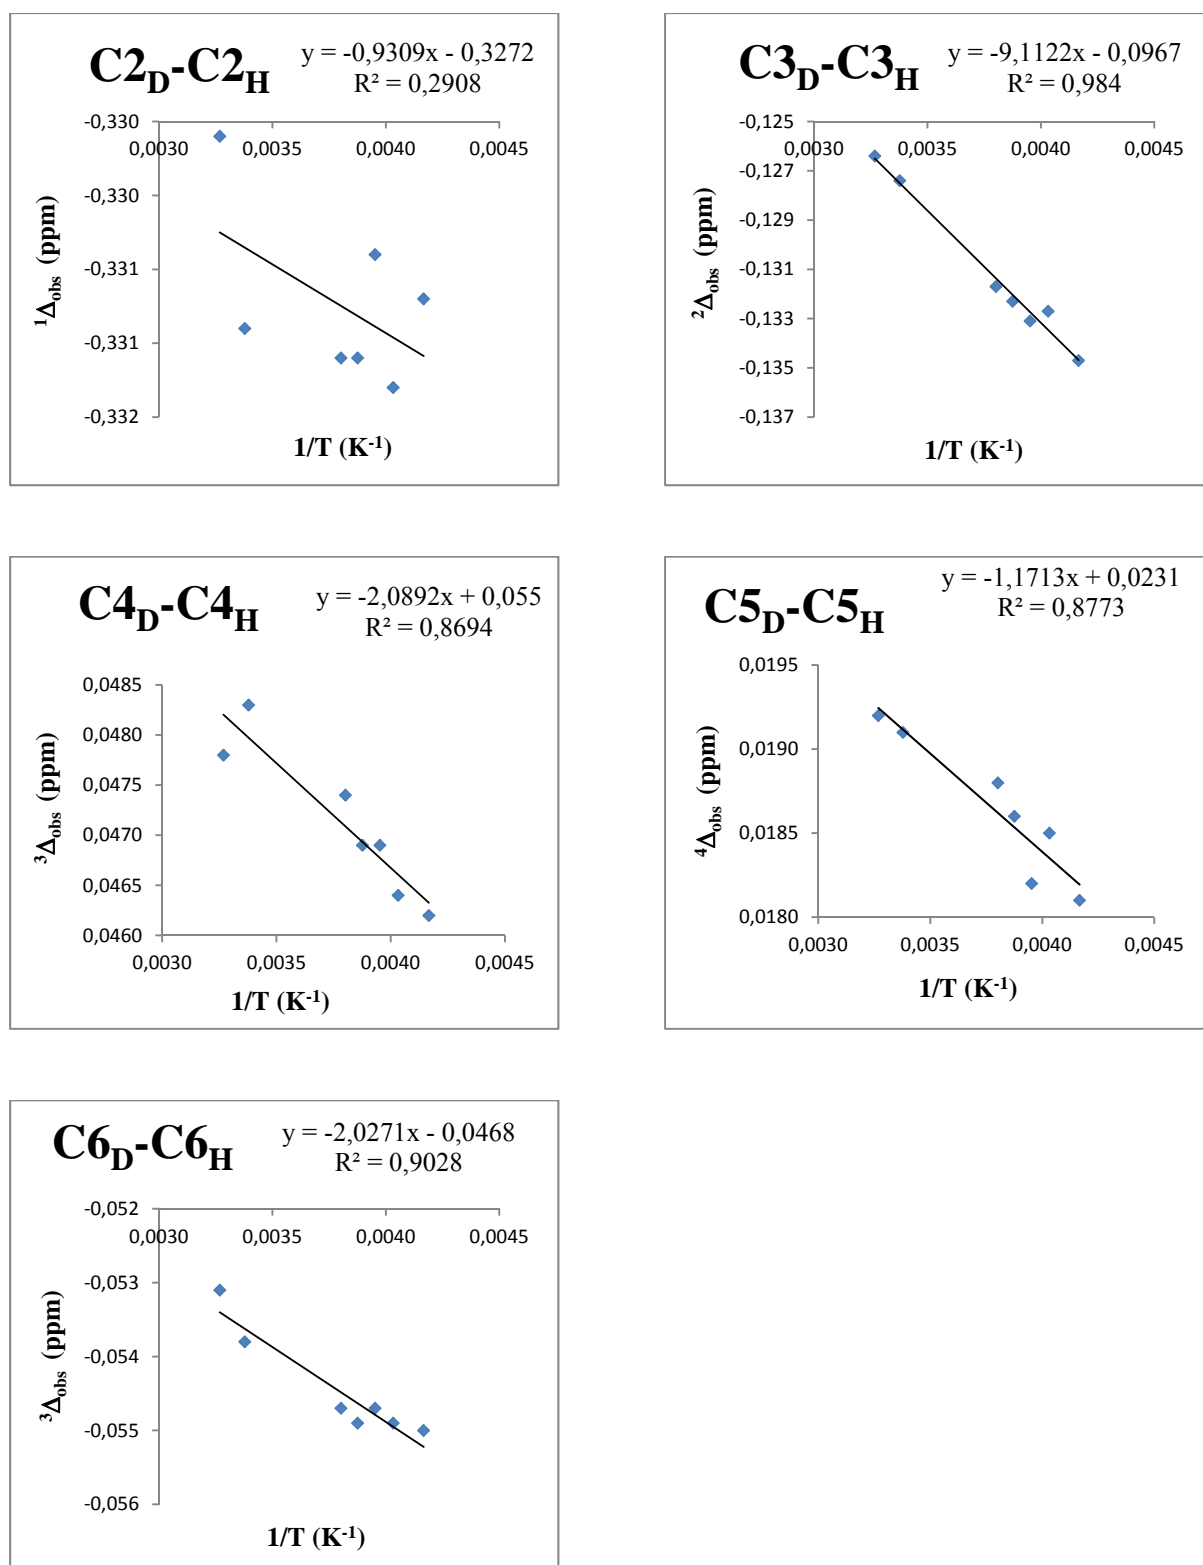

**Figure S5.** The temperature dependence of the isotope shifts of pyridine-pyridinium triflate (**3-d<sub>0</sub>/3-d<sub>1</sub>**), shown for each carbon separately.

**Pyridine-*d*<sub>0</sub>/Pyridine-*d*<sub>1</sub>**

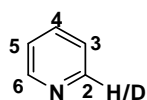

**Table S7.** The chemical shifts of pyridine/pyridine-*d*<sub>1</sub> given in ppm.

| Temp.<br>(°C) | $\delta$<br>C2 <sub>H,6H</sub> | $\delta$<br>C6 <sub>D</sub> | $\delta$<br>C2 <sub>D</sub> | $\delta$<br>C4 <sub>H</sub> | $\delta$<br>C4 <sub>D</sub> | $\delta$<br>C3 <sub>H,5H</sub> | $\delta$<br>C5 <sub>D</sub> | $\delta$<br>C3 <sub>D</sub> |
|---------------|--------------------------------|-----------------------------|-----------------------------|-----------------------------|-----------------------------|--------------------------------|-----------------------------|-----------------------------|
| 70            | 151.1473                       | 151.1331                    | 150.8185                    | 137.1297                    | 137.1297                    | 125.0374                       | 125.0505                    | 124.9014                    |
| 55            | 151.0073                       | 150.9921                    | 150.6785                    | 137.0433                    | 137.0433                    | 124.9343                       | 124.9457                    | 124.7974                    |
| 40            | 150.8697                       | 150.8542                    | 150.5384                    | 136.9587                    | 136.9587                    | 124.8333                       | 124.8444                    | 124.6939                    |
| 25            | 150.7291                       | 150.7133                    | 150.3962                    | 136.8721                    | 136.8721                    | 124.7292                       | 124.7414                    | 124.5882                    |
| 10            | 150.5938                       | 150.5774                    | 150.2597                    | 136.7903                    | 136.7903                    | 124.6282                       | 124.6409                    | 124.4859                    |
| 0             | 150.4998                       | 150.4828                    | 150.1651                    | 136.7333                    | 136.7333                    | 124.5600                       | 124.5732                    | 124.4159                    |
| -10           | 150.4030                       | 150.3857                    | 150.0672                    | 136.6756                    | 136.6756                    | 124.4886                       | 124.5020                    | 124.3436                    |
| -15           | 150.3558                       | 150.3382                    | 150.0186                    | 136.6479                    | 136.6479                    | 124.4537                       | 124.4670                    | 124.3079                    |
| -30           | 150.2078                       | 150.1901                    | 149.8713                    | 136.5606                    | 136.5606                    | 124.3447                       | 124.3587                    | 124.1977                    |

**Table S8.** The temperature dependence of the isotope shifts for pyridine/pyridine-*d*<sub>1</sub> given in ppm.

| Temp.<br>(°C) | <sup>1</sup> $\Delta_{\text{obs}}$<br>$\delta_{\text{C2D}} - \delta_{\text{C2H}}$ | <sup>3</sup> $\Delta_{\text{obs}}$<br>$\delta_{\text{C6D}} - \delta_{\text{C6H}}$ | <sup>3</sup> $\Delta_{\text{obs}}$<br>$\delta_{\text{C4D}} - \delta_{\text{C4H}}$ | <sup>2</sup> $\Delta_{\text{obs}}$<br>$\delta_{\text{C3D}} - \delta_{\text{C3H}}$ | <sup>4</sup> $\Delta_{\text{obs}}$<br>$\delta_{\text{C5D}} - \delta_{\text{C5H}}$ |
|---------------|-----------------------------------------------------------------------------------|-----------------------------------------------------------------------------------|-----------------------------------------------------------------------------------|-----------------------------------------------------------------------------------|-----------------------------------------------------------------------------------|
| 70            | -0.3288                                                                           | -0.0142                                                                           | 0.0000                                                                            | -0.1360                                                                           | 0.0131                                                                            |
| 55            | -0.3288                                                                           | -0.0152                                                                           | 0.0000                                                                            | -0.1369                                                                           | 0.0114                                                                            |
| 40            | -0.3313                                                                           | -0.0155                                                                           | 0.0000                                                                            | -0.1394                                                                           | 0.0111                                                                            |
| 25            | -0.3329                                                                           | -0.0158                                                                           | 0.0000                                                                            | -0.1410                                                                           | 0.0122                                                                            |
| 10            | -0.3341                                                                           | -0.0164                                                                           | 0.0000                                                                            | -0.1425                                                                           | 0.0125                                                                            |
| 0             | -0.3347                                                                           | -0.0170                                                                           | 0.0000                                                                            | -0.1441                                                                           | 0.0132                                                                            |
| -10           | -0.3358                                                                           | -0.0173                                                                           | 0.0000                                                                            | -0.1450                                                                           | 0.0134                                                                            |
| -15           | -0.3372                                                                           | -0.0176                                                                           | 0.0000                                                                            | -0.1458                                                                           | 0.0133                                                                            |
| -30           | -0.3365                                                                           | -0.0177                                                                           | 0.0000                                                                            | -0.1470                                                                           | 0.0140                                                                            |

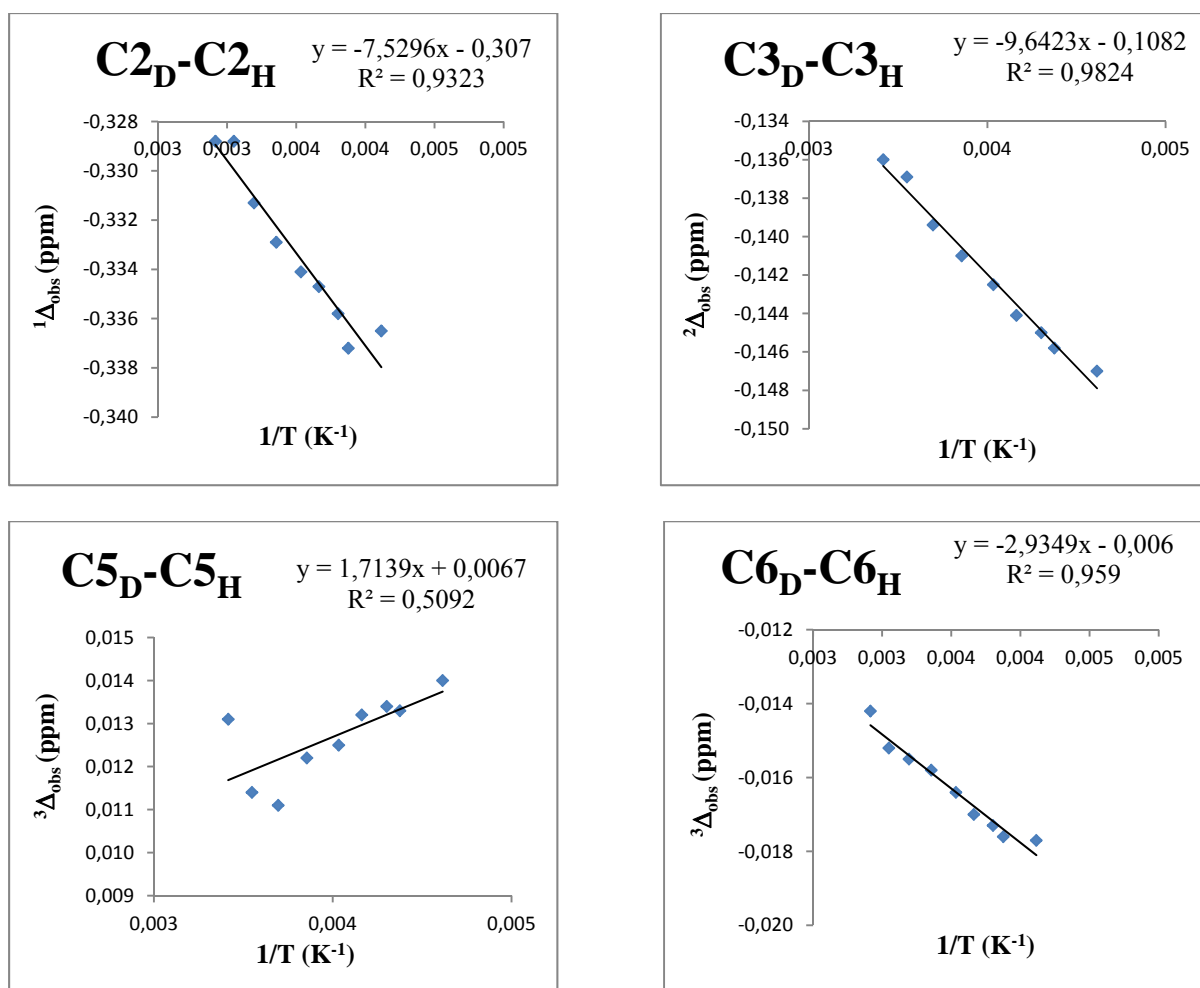

**Figure S6.** The temperature dependence of the isotope shifts of pyridine/pyridine-*d*<sub>1</sub> shown for each carbon separately.

### 3 Computational Details: Geometry Optimization and Thermochemistry

All calculations in this work were performed with the Gaussian09 program package.<sup>6</sup> The computational protocol was kept identical to that in Refs. 7 and 8 as far as possible. Geometries were optimized with density functional theory (DFT) using the B3LYP exchange and correlation functional<sup>9</sup> and the LANL08 basis set<sup>10</sup> and LANL2DZ effective core potential (ECP)<sup>11</sup> for I and Br, Pople's 6-311++G(d,p) basis set<sup>12,13,14</sup> for N and the H atom in the N-H-N bond of **3**, and Pople's 6-311G(d,p)<sup>12,13</sup> basis set otherwise. This construction of the basis set ensures that the basis set (i) is of triple-zeta quality including polarization functions for all atoms, (ii) provides diffuse functions for all atoms involved in hydrogen or halogen bonds. At the same time, the size of the basis set is still tractable. However, the 6-311+G(d,p) basis set was used for all atoms in the triflate moiety to account for the anionic character of the triflate ion. Solvent effects were taken into account by the polarisable continuum model (PCM)<sup>15</sup> with CH<sub>2</sub>Cl<sub>2</sub> ( $\epsilon = 8.93$ ) and CH<sub>3</sub>CN ( $\epsilon = 35.69$ ). To ensure proper convergence of the SCRF calculations in all cases, the cavity had to be constructed as solvent-excluded surface (Gaussian 09 keyword: `Surface=SES`) with atomic radii from the all-atom universal force field (Gaussian 09 keyword: `Radii=UA0`), in distinction from the protocol used in Refs. 7 and 8. Hence, the results presented here for solution in CH<sub>2</sub>Cl<sub>2</sub> differ slightly from those in Refs. 7 and 8. Natural atomic populations (NAP) were calculated with the natural-bond orbital (NBO) analysis package<sup>16</sup> as implemented in Gaussian 09.

<sup>6</sup>Gaussian 09, Revision B.01, M. J. Frisch, G. W. Trucks, H. B. Schlegel, G. E. Scuseria, M. A. Robb, J. R. Cheeseman, G. Scalmani, V. Barone, B. Mennucci, G. A. Petersson, H. Nakatsuji, M. Caricato, X. Li, H. P. Hratchian, A. F. Izmaylov, J. Bloino, G. Zheng, J. L. Sonnenberg, M. Hada, M. Ehara, K. Toyota, R. Fukuda, J. Hasegawa, M. Ishida, T. Nakajima, Y. Honda, O. Kitao, H. Nakai, T. Vreven, J. A. Montgomery, Jr., J. E. Peralta, F. Ogliaro, M. Bearpark, J. J. Heyd, E. Brothers, K. N. Kudin, V. N. Staroverov, R. Kobayashi, J. Normand, K. Raghavachari, A. Rendell, J. C. Burant, S. S. Iyengar, J. Tomasi, M. Cossi, N. Rega, J. M. Millam, M. Klene, J. E. Knox, J. B. Cross, V. Bakken, C. Adamo, J. Jaramillo, R. Gomperts, R. E. Stratmann, O. Yazyev, A. J. Austin, R. Cammi, C. Pomelli, J. W. Ochterski, R. L. Martin, K. Morokuma, V. G. Zakrzewski, G. A. Voth, P. Salvador, J. J. Dannenberg, S. Dapprich, A. D. Daniels, Ö. Farkas, J. B. Foresman, J. V. Ortiz, J. Cioslowski, and D. J. Fox, Gaussian, Inc., Wallingford CT, 2010.

<sup>7</sup>A. C. Carlsson, J. Grafenstein, J. L. Laurila, J. Bergquist and M. Erdelyi, *Chem. Commun.*, 2012, **48**, 1458

<sup>8</sup>A. C. Carlsson, J. Grafenstein, A. Budnjo, J. L. Laurila, J. Bergquist, A. Karim, R. Kleinmaier, U. Brath and M. Erdelyi, *J. Am. Chem. Soc.*, 2012, **134**, 5706.

<sup>9</sup>(a) A. D. Becke, *J. Chem. Phys.*, 1993, **98**, 5648; (b) C. Lee, W. Yang and R. G. Parr, *Phys. Rev. B*, 1988, **37**, 785; (c) S. H. Vosko, L. Wilk and M. Nusair, *Can. J. Phys.*, 1980, **58**, 1200; (d) P. J. Stephens, F. J. Devlin, C. F. Chabalowski and M. J. Frisch, *J. Phys. Chem.*, 1994, **98**, 11623.

<sup>10</sup>L. E. Roy, P. J. Hay and R. L. Martin, *J. Chem. Theory Comput.*, 2008, **4**, 1029.

<sup>11</sup>(a) P. J. Hay and W. R. Wadt, *J. Chem. Phys.*, 1985, **82**, 27; (b) P. J. Hay and W. R. Wadt, *J. Chem. Phys.*, 1985, **82**, 284; (c) P. J. Hay and W. R. Wadt, *J. Chem. Phys.*, 1985, **82**, 299.

<sup>12</sup>(a) R. Krishnan, J. S. Binkley, R. Seeger and J. A. Pople, *J. Chem. Phys.*, 1980, **72**, 650.

(b) M. M. Francl, W. J. Pietro, W. J. Hehre, J. S. Binkley, M. S. Gordon, D. J. DeFrees and J. A. Pople, *J. Chem. Phys.*, 1982, **77**, 3654.

<sup>13</sup>R. Krishnan, J. S. Binkley, R. Seeger and J. A. Pople, *J. Chem. Phys.*, 1980, **72**, 650.

<sup>14</sup>T. Clark, J. Chandrasekhar, G. W. Spitznagel and P. v. R. Schleyer, *J. Comp. Chem.*, 1983, **4**, 294.

<sup>15</sup>(a) B. Mennucci and J. Tomasi, *J. Chem. Phys.*, 1997, **106**, 5151; (b) M. Cossi, G. Scalmani, N. Rega and V. Barone, *J. Chem. Phys.*, 2002, **117**, 43.

<sup>16</sup>A. E. Reed and F. Weinhold, *J. Chem. Phys.*, 1985, **83**, 1736. A. E. Reed, R. B. Weinstock, and F. Weinhold, *J. Chem. Phys.*, 1985, **83**, 735.

DFT description of the three-center four-electron bonds in **1** and **2** is subtle due to the incomplete coverage of non-dynamic electron on the one hand and the self-interaction error on the other hand.<sup>17,18</sup> The reliability of the applied DFT method for **1** and **2** was previously confirmed<sup>7</sup> using second-order Møller-Plesset (MP2) perturbation theory<sup>19</sup> and the same basis set as described in the previous paragraph, the details being given in reference 4.

### 3.1 Equilibrium Geometries and Selected Charges

**Table S7.** Computationally predicted N-X and N-N distances [Å] for the equilibrium geometries of **1**, **2**, and **3**.<sup>a</sup>

| Structure<br>Solvent                                                                | X    | $d_{N-X(1)}$                        | $d_{N-X(2)}$ | $d_{N-N}$ | $d_{N-X(1)}$            | $d_{N-X(2)}$ | $d_{N-N}$ |
|-------------------------------------------------------------------------------------|------|-------------------------------------|--------------|-----------|-------------------------|--------------|-----------|
|                                                                                     |      | <b>CH<sub>2</sub>Cl<sub>2</sub></b> |              |           | <b>CH<sub>3</sub>CN</b> |              |           |
|    | Br   | 1.894                               |              |           | 1.893                   |              |           |
|                                                                                     | I    | 2.093                               |              |           | 2.092                   |              |           |
|                                                                                     | H    | 1.024                               |              |           | 1.015                   |              |           |
|  | 1 Br | 2.139                               | 2.139        | 4.278     | 2.139                   | 2.139        | 4.278     |
|                                                                                     | 2 I  | 2.301                               | 2.301        | 4.602     | 2.301                   | 2.301        | 4.602     |
|                                                                                     | 3 H  | 1.078                               | 1.678        | 2.755     | 1.076                   | 1.689        | 2.765     |
|  | 1 Br | 2.140                               | 2.140        | 4.280     | 2.140                   | 2.140        | 4.280     |
|                                                                                     | 2 I  | 2.302                               | 2.302        | 4.604     | 2.304                   | 2.304        | 4.607     |
|                                                                                     | 3 H  | 1.084                               | 1.646        | 2.730     | 1.081                   | 1.657        | 2.738     |
|  | Br   |                                     |              |           | 2.060                   | 2.060        | 4.120     |
|                                                                                     | I    |                                     |              |           | 2.228                   | 2.228        | 4.456     |
|  | Br   |                                     |              |           | 1.940                   | 2.470        | 4.410     |
|                                                                                     | I    |                                     |              |           | 2.180                   | 2.450        | 4.630     |

(a) Values in italics are from Ref. 7, the differences are due to the different construction of the cavity in the PCM calculations.

<sup>17</sup> See e.g. A. D. Becke, *J. Chem. Phys.*, 2003, **119**, 2972.

<sup>18</sup> See e.g. J. Gräfenstein and D. Cremer, *Theor. Chem. Accounts*, 2009, **123**, 171.

<sup>19</sup> C. Møller and M. S. Plesset, *Phys. Rev.*, 1934, **46**, 618.

### 3.2 Cartesian Coordinates, Thermochemistry Data, and Selected Vibrational Frequencies

Energies are given in Hartree units unless otherwise stated, coordinates in Ångström, vibrational frequencies in  $\text{cm}^{-1}$ . E(e) denotes the electronic energy (without ZPE), E(298), H(298), and G(298) the energy (including vibrational corrections), enthalpy, and Gibbs free energy at 298.15 K and 1 atm.

Only selected vibrational frequencies are given, in particular: all imaginary frequencies, small frequencies that indicate the geometric stability of a compound, and the frequencies for the N–X–N stretching vibrations. For complexes with symmetric N–X–N geometry, the frequencies are labeled as (s) = symmetric or (a) = antisymmetric.

For a number of compounds, several geometries are given, referring to non-global minima or transition state. For the compounds used in the thermochemical calculations, the headline of the data block is underlined.

### 3.2.1 Acetonitrile

---

#### pyridine C2v SCRF DFT

Charge = 0 Multiplicity = 1

|   |          |           |           |
|---|----------|-----------|-----------|
| N | 0.000000 | 0.000000  | 1.417595  |
| C | 0.000000 | 1.144718  | 0.720561  |
| C | 0.000000 | 1.197233  | -0.671396 |
| C | 0.000000 | 0.000000  | -1.382054 |
| C | 0.000000 | -1.197233 | -0.671396 |
| C | 0.000000 | -1.144718 | 0.720561  |
| H | 0.000000 | 2.062091  | 1.303839  |
| H | 0.000000 | 2.154664  | -1.180600 |
| H | 0.000000 | 0.000000  | -2.467301 |
| H | 0.000000 | -2.154664 | -1.180600 |
| H | 0.000000 | -2.062091 | 1.303839  |

  

|         |   |                 |        |
|---------|---|-----------------|--------|
| E (e)   | = | -248.3558104620 |        |
| ZPE     | = | 0.088257        |        |
|         | = | 231.718916      | kJ/mol |
| E (298) | = | -248.263274     |        |
| H (298) | = | -248.262330     |        |
| G (298) | = | -248.294301     |        |

---

#### 1 D2d SCRF DFT

Charge = 1 Multiplicity = 1

|    |           |           |           |
|----|-----------|-----------|-----------|
| Br | 0.000000  | 0.000000  | 0.000000  |
| N  | 0.000000  | 0.000000  | 2.139320  |
| C  | 0.000000  | 1.168486  | 2.799239  |
| C  | 0.000000  | 1.201986  | 4.185624  |
| C  | 0.000000  | 0.000000  | 4.889330  |
| C  | 0.000000  | -1.201986 | 4.185624  |
| C  | 0.000000  | -1.168486 | 2.799239  |
| N  | 0.000000  | 0.000000  | -2.139320 |
| C  | 1.168486  | 0.000000  | -2.799239 |
| C  | 1.201986  | 0.000000  | -4.185624 |
| C  | 0.000000  | 0.000000  | -4.889330 |
| C  | -1.201986 | 0.000000  | -4.185624 |
| C  | -1.168486 | 0.000000  | -2.799239 |
| H  | 0.000000  | 2.069700  | 2.196072  |
| H  | 0.000000  | 2.157927  | 4.696052  |
| H  | 0.000000  | 0.000000  | 5.974145  |
| H  | 0.000000  | -2.157927 | 4.696052  |
| H  | 0.000000  | -2.069700 | 2.196072  |
| H  | 2.069700  | 0.000000  | -2.196072 |
| H  | 2.157927  | 0.000000  | -4.696052 |
| H  | 0.000000  | 0.000000  | -5.974145 |
| H  | -2.157927 | 0.000000  | -4.696052 |
| H  | -2.069700 | 0.000000  | -2.196072 |

  

|         |   |                 |        |
|---------|---|-----------------|--------|
| E (e)   | = | -509.7052870590 |        |
| ZPE     | = | 0.180392        |        |
|         | = | 473.619637      | kJ/mol |
| E (298) | = | -509.513126     |        |
| H (298) | = | -509.512182     |        |
| G (298) | = | -509.564785     |        |

Frequencies:

|    |              |
|----|--------------|
| B2 | 161.6342 (a) |
| A1 | 173.0364 (s) |

---

## 1 D2h SCRF DFT

Charge = 1 Multiplicity = 1

|    |          |           |           |
|----|----------|-----------|-----------|
| Br | 0.000000 | 0.000000  | 0.000000  |
| N  | 0.000000 | 0.000000  | 2.138772  |
| C  | 0.000000 | 1.168437  | 2.798622  |
| C  | 0.000000 | 1.201974  | 4.184989  |
| C  | 0.000000 | 0.000000  | 4.888733  |
| C  | 0.000000 | -1.201974 | 4.184989  |
| C  | 0.000000 | -1.168437 | 2.798622  |
| N  | 0.000000 | 0.000000  | -2.138772 |
| C  | 0.000000 | -1.168437 | -2.798622 |
| C  | 0.000000 | -1.201974 | -4.184989 |
| C  | 0.000000 | 0.000000  | -4.888733 |
| C  | 0.000000 | 1.201974  | -4.184989 |
| C  | 0.000000 | 1.168437  | -2.798622 |
| H  | 0.000000 | 2.069692  | 2.195424  |
| H  | 0.000000 | 2.157929  | 4.695387  |
| H  | 0.000000 | 0.000000  | 5.973541  |
| H  | 0.000000 | -2.157929 | 4.695387  |
| H  | 0.000000 | -2.069692 | 2.195424  |
| H  | 0.000000 | -2.069692 | -2.195424 |
| H  | 0.000000 | -2.157929 | -4.695387 |
| H  | 0.000000 | 0.000000  | -5.973541 |
| H  | 0.000000 | 2.157929  | -4.695387 |
| H  | 0.000000 | 2.069692  | -2.195424 |

E (e) = -509.7052866990  
ZPE = 0.180378  
= 473.582650 kJ/mol  
E (298) = -509.513136  
H (298) = -509.512192  
G (298) = -509.564795

### Frequencies:

B1U 161.8916 (a)  
AG 172.7634 (s)

---

## 2 C2v twisted SCRF DFT

Charge = 1 Multiplicity = 1

|   |           |           |           |
|---|-----------|-----------|-----------|
| N | 2.303548  | 0.000000  | 0.000000  |
| C | 2.972076  | -0.830482 | 0.819046  |
| C | 4.358090  | -0.854957 | 0.843218  |
| C | 5.063061  | 0.000000  | 0.000000  |
| C | 4.358090  | 0.854957  | -0.843218 |
| C | 2.972076  | 0.830482  | -0.819046 |
| H | 2.374635  | -1.474837 | 1.454482  |
| H | 4.867205  | -1.536071 | 1.514992  |
| H | 6.147858  | 0.000000  | 0.000000  |
| H | 4.867205  | 1.536071  | -1.514992 |
| H | 2.374635  | 1.474837  | -1.454482 |
| I | -0.000013 | 0.000000  | 0.000000  |
| N | -2.303530 | 0.000000  | 0.000000  |
| C | -2.972060 | 0.830452  | 0.819075  |
| C | -4.358074 | 0.854924  | 0.843251  |
| C | -5.063045 | 0.000000  | 0.000000  |
| C | -4.358074 | -0.854924 | -0.843251 |
| C | -2.972060 | -0.830452 | -0.819075 |
| H | -2.374619 | 1.474787  | 1.454531  |
| H | -4.867188 | 1.536012  | 1.515052  |
| H | -6.147842 | 0.000000  | 0.000000  |
| H | -4.867189 | -1.536012 | -1.515052 |
| H | -2.374619 | -1.474787 | -1.454531 |

E (e) = -507.9394097090  
ZPE = 0.180209  
= 473.137222 kJ/mol  
E (298) = -507.747253  
H (298) = -507.746309  
G (298) = -507.802356

### Frequencies:

A 4.8134  
A 163.2099 (a)  
A 165.4807 (s)



---

## 2 D2d SCRF DFT

Charge = 1 Multiplicity = 1

|   |           |           |           |  |
|---|-----------|-----------|-----------|--|
| I | 0.000000  | 0.000000  | 0.000000  |  |
| N | 0.000000  | 0.000000  | 2.302262  |  |
| C | 0.000000  | 1.166606  | 2.970701  |  |
| C | 0.000000  | 1.200948  | 4.356767  |  |
| C | 0.000000  | 0.000000  | 5.061639  |  |
| C | 0.000000  | -1.200948 | 4.356767  |  |
| C | 0.000000  | -1.166606 | 2.970701  |  |
| N | 0.000000  | 0.000000  | -2.302262 |  |
| C | 1.166606  | 0.000000  | -2.970701 |  |
| C | 1.200948  | 0.000000  | -4.356767 |  |
| C | 0.000000  | 0.000000  | -5.061639 |  |
| C | -1.200948 | 0.000000  | -4.356767 |  |
| C | -1.166606 | 0.000000  | -2.970701 |  |
| H | 0.000000  | 2.071818  | 2.373573  |  |
| H | 0.000000  | 2.157450  | 4.866176  |  |
| H | 0.000000  | 0.000000  | 6.146456  |  |
| H | 0.000000  | -2.157450 | 4.866176  |  |
| H | 0.000000  | -2.071818 | 2.373573  |  |
| H | 2.071818  | 0.000000  | -2.373573 |  |
| H | 2.157450  | 0.000000  | -4.866176 |  |
| H | 0.000000  | 0.000000  | -6.146456 |  |
| H | -2.157450 | 0.000000  | -4.866176 |  |
| H | -2.071818 | 0.000000  | -2.373573 |  |

  

|         |   |                 |        |
|---------|---|-----------------|--------|
| E (e)   | = | -507.9392567900 |        |
| ZPE     | = | 0.180075        |        |
|         | = | 472.787147      | kJ/mol |
| E (298) | = | -507.748132     |        |
| H (298) | = | -507.747188     |        |
| G (298) | = | -507.797724     |        |

  

Frequencies:

|    |              |  |
|----|--------------|--|
| B1 | -8.4456      |  |
| B2 | 161.4689 (a) |  |
| A1 | 165.1209 (s) |  |

---

## 2 D2h SCRF DFT

Charge = 1 Multiplicity = 1

|   |          |           |           |  |
|---|----------|-----------|-----------|--|
| I | 0.000000 | 0.000000  | 0.000000  |  |
| N | 0.000000 | 0.000000  | 2.301714  |  |
| C | 0.000000 | 1.166568  | 2.970093  |  |
| C | 0.000000 | 1.200939  | 4.356139  |  |
| C | 0.000000 | 0.000000  | 5.061049  |  |
| C | 0.000000 | -1.200939 | 4.356139  |  |
| C | 0.000000 | -1.166568 | 2.970093  |  |
| N | 0.000000 | 0.000000  | -2.301714 |  |
| C | 0.000000 | -1.166568 | -2.970093 |  |
| C | 0.000000 | -1.200939 | -4.356139 |  |
| C | 0.000000 | 0.000000  | -5.061049 |  |
| C | 0.000000 | 1.200939  | -4.356139 |  |
| C | 0.000000 | 1.166568  | -2.970093 |  |
| H | 0.000000 | 2.071831  | 2.372966  |  |
| H | 0.000000 | 2.157460  | 4.865512  |  |
| H | 0.000000 | 0.000000  | 6.145860  |  |
| H | 0.000000 | -2.157460 | 4.865512  |  |
| H | 0.000000 | -2.071831 | 2.372966  |  |
| H | 0.000000 | -2.071831 | -2.372966 |  |
| H | 0.000000 | -2.157460 | -4.865512 |  |
| H | 0.000000 | 0.000000  | -6.145860 |  |
| H | 0.000000 | 2.157460  | -4.865512 |  |
| H | 0.000000 | 2.071831  | -2.372966 |  |

  

|         |   |                 |        |
|---------|---|-----------------|--------|
| E (e)   | = | -507.9392742810 |        |
| ZPE     | = | 0.180067        |        |
|         | = | 472.764678      | kJ/mol |
| E (298) | = | -507.748156     |        |
| H (298) | = | -507.747212     |        |
| G (298) | = | -507.797750     |        |

  

Frequencies:

|     |              |  |
|-----|--------------|--|
| AU  | -8.8677      |  |
| B1U | 161.7143 (a) |  |

AG

164.9372 (s)

---

### 3 C2v twisted SCRF DFT

Charge = 1 Multiplicity = 1

|   |           |           |           |
|---|-----------|-----------|-----------|
| H | 0.000000  | 0.000000  | 0.301911  |
| N | 0.000000  | 0.000000  | 1.383083  |
| C | 0.000000  | 1.177067  | 2.032802  |
| C | 0.000000  | 1.206557  | 3.415696  |
| C | 0.000000  | 0.000000  | 4.114708  |
| C | 0.000000  | -1.206557 | 3.415696  |
| C | 0.000000  | -1.177067 | 2.032802  |
| N | 0.000000  | 0.000000  | -1.354899 |
| C | 1.153609  | 0.000000  | -2.040439 |
| C | 1.199677  | 0.000000  | -3.429573 |
| C | 0.000000  | 0.000000  | -4.136829 |
| C | -1.199677 | 0.000000  | -3.429573 |
| C | -1.153609 | 0.000000  | -2.040439 |
| H | 0.000000  | 2.068433  | 1.415521  |
| H | 0.000000  | 2.158987  | 3.931754  |
| H | 0.000000  | 0.000000  | 5.199731  |
| H | 0.000000  | -2.158987 | 3.931754  |
| H | 0.000000  | -2.068433 | 1.415521  |
| H | 2.065564  | 0.000000  | -1.450161 |
| H | 2.155820  | 0.000000  | -3.940187 |
| H | 0.000000  | 0.000000  | -5.221888 |
| H | -2.155820 | 0.000000  | -3.940187 |
| H | -2.065564 | 0.000000  | -1.450161 |

E (e) = -497.1744979390  
ZPE = 0.190524  
= 500.220798 kJ/mol  
E (298) = -496.973581  
H (298) = -496.972637  
G (298) = -497.022392

Frequencies:  
A1 127.2338  
A1 611.0440

---

### 3 C2v planar SCRF DFT

Charge = 1 Multiplicity = 1

|   |          |           |           |
|---|----------|-----------|-----------|
| H | 0.000000 | 0.000000  | 0.321471  |
| N | 0.000000 | 0.000000  | 1.397362  |
| C | 0.000000 | 1.177040  | 2.048494  |
| C | 0.000000 | 1.206123  | 3.431082  |
| C | 0.000000 | 0.000000  | 4.130350  |
| C | 0.000000 | -1.206123 | 3.431082  |
| C | 0.000000 | -1.177040 | 2.048494  |
| N | 0.000000 | 0.000000  | -1.367777 |
| C | 0.000000 | -1.152237 | -2.056653 |
| C | 0.000000 | -1.198834 | -3.445783 |
| C | 0.000000 | 0.000000  | -4.153837 |
| C | 0.000000 | 1.198834  | -3.445783 |
| C | 0.000000 | 1.152237  | -2.056653 |
| H | 0.000000 | 2.069982  | 1.433921  |
| H | 0.000000 | 2.158730  | 3.946801  |
| H | 0.000000 | 0.000000  | 5.215365  |
| H | 0.000000 | -2.158730 | 3.946801  |
| H | 0.000000 | -2.069982 | 1.433921  |
| H | 0.000000 | -2.066540 | -1.470125 |
| H | 0.000000 | -2.155482 | -3.955495 |
| H | 0.000000 | 0.000000  | -5.238888 |
| H | 0.000000 | 2.155482  | -3.955495 |
| H | 0.000000 | 2.066540  | -1.470125 |

E (e) = -497.1730487440  
ZPE = 0.190665  
= 500.591751 kJ/mol  
E (298) = -496.972945  
H (298) = -496.972001  
G (298) = -497.018376

Frequencies:  
A2 -51.3630

A1 146.2439 (a)  
A1 611.7396 (s)

---

**Acetonitrile C3v SCRF DFT**

Charge = 0 Multiplicity = 1

|   |           |           |           |
|---|-----------|-----------|-----------|
| N | 0.000000  | 0.000000  | 1.432336  |
| C | 0.000000  | 0.000000  | 0.279074  |
| C | 0.000000  | 0.000000  | -1.175586 |
| H | 0.000000  | 1.026082  | -1.549091 |
| H | 0.888613  | -0.513041 | -1.549091 |
| H | -0.888613 | -0.513041 | -1.549091 |

  

|        |   |                 |        |
|--------|---|-----------------|--------|
| E(e)   | = | -132.8030090700 |        |
| ZPE    | = | 0.045103        |        |
|        | = | 118.416865      | kJ/mol |
| E(298) | = | -132.754315     |        |
| H(298) | = | -132.753371     |        |
| G(298) | = | -132.780867     |        |

  

Frequencies:  
E 393.1575

---

**pyridine-bromonium-acetonitrile complex D3h SCRF DFT**

Charge = 1 Multiplicity = 1

|    |           |           |           |
|----|-----------|-----------|-----------|
| N  | 0.000000  | 0.000000  | 2.060100  |
| C  | 0.000000  | 0.000000  | 3.207055  |
| C  | 0.000000  | 0.000000  | 4.652604  |
| H  | 0.000000  | 1.030531  | 5.015760  |
| H  | -0.892466 | -0.515266 | 5.015760  |
| H  | 0.892466  | -0.515266 | 5.015760  |
| Br | 0.000000  | 0.000000  | 0.000000  |
| N  | 0.000000  | 0.000000  | -2.060100 |
| C  | 0.000000  | 0.000000  | -3.207055 |
| C  | 0.000000  | 0.000000  | -4.652604 |
| H  | 0.000000  | 1.030531  | -5.015760 |
| H  | 0.892466  | -0.515266 | -5.015760 |
| H  | -0.892466 | -0.515266 | -5.015760 |

  

|        |   |                 |        |
|--------|---|-----------------|--------|
| E(e)   | = | -278.5362776150 |        |
| ZPE    | = | 0.092942        |        |
|        | = | 244.019081      | kJ/mol |
| E(298) | = | -278.432712     |        |
| H(298) | = | -278.431768     |        |
| G(298) | = | -278.481130     |        |

---

**pyridine-iodonium-acetonitrile complex D3h SCRF DFT**

Charge = 1 Multiplicity = 1

|   |           |           |           |
|---|-----------|-----------|-----------|
| N | 0.000000  | 0.000000  | 2.227939  |
| C | 0.000000  | 0.000000  | 3.375806  |
| C | 0.000000  | 0.000000  | 4.821272  |
| H | 0.000000  | 1.030273  | 5.185199  |
| H | -0.892243 | -0.515137 | 5.185199  |
| H | 0.892243  | -0.515137 | 5.185199  |
| I | 0.000000  | 0.000000  | 0.000000  |
| N | 0.000000  | 0.000000  | -2.227939 |
| C | 0.000000  | 0.000000  | -3.375806 |
| C | 0.000000  | 0.000000  | -4.821272 |
| H | 0.000000  | 1.030273  | -5.185199 |
| H | 0.892243  | -0.515137 | -5.185199 |
| H | -0.892243 | -0.515137 | -5.185199 |

  

|        |   |                 |        |
|--------|---|-----------------|--------|
| E(e)   | = | -276.7822751010 |        |
| ZPE    | = | 0.092891        |        |
|        | = | 243.886406      | kJ/mol |
| E(298) | = | -276.678786     |        |
| H(298) | = | -276.677841     |        |
| G(298) | = | -276.727405     |        |

---

### **pyridine-protium-acetonitrile complex D3h SCRF DFT**

Charge = 1 Multiplicity = 1

|   |           |           |           |
|---|-----------|-----------|-----------|
| H | -0.001253 | 0.446929  | 0.000000  |
| N | -0.001437 | -0.590479 | 0.000000  |
| C | -0.001433 | -1.235319 | 1.181528  |
| C | -0.001433 | -2.616956 | 1.207435  |
| C | -0.001426 | -3.314810 | 0.000000  |
| C | -0.001433 | -2.616956 | -1.207435 |
| C | -0.001433 | -1.235319 | -1.181528 |
| H | -0.001412 | -0.615066 | 2.070329  |
| H | -0.001418 | -3.133575 | 2.159478  |
| H | -0.001394 | -4.399857 | 0.000000  |
| H | -0.001418 | -3.133575 | -2.159478 |
| H | -0.001412 | -0.615066 | -2.070329 |
| N | 0.000157  | 2.284314  | 0.000000  |
| C | 0.002130  | 3.435414  | 0.000000  |
| C | 0.005038  | 4.887339  | 0.000000  |
| H | 1.033091  | 5.255595  | 0.000000  |
| H | -0.507941 | 5.258708  | -0.889631 |
| H | -0.507941 | 5.258708  | 0.889631  |

  

|         |   |                 |        |
|---------|---|-----------------|--------|
| E (e)   | = | -381.6140869970 |        |
| ZPE     | = | 0.147904        |        |
|         | = | 388.322647      | kJ/mol |
| E (298) | = | -381.456237     |        |
| H (298) | = | -381.455293     |        |
| G (298) | = | -381.505692     |        |

---

### **OTf- Cs SCRF DFT**

Charge = -1 Multiplicity = 1

|   |           |           |           |
|---|-----------|-----------|-----------|
| S | -0.410103 | -0.823814 | 0.000000  |
| C | 0.430493  | 0.864227  | 0.000000  |
| O | -1.847724 | -0.483556 | 0.000000  |
| F | 1.769013  | 0.737293  | 0.000000  |
| F | 0.083511  | 1.575575  | 1.086795  |
| F | 0.083511  | 1.575575  | -1.086795 |
| O | 0.083511  | -1.445742 | 1.245736  |
| O | 0.083511  | -1.445742 | -1.245736 |

  

|         |   |                 |        |
|---------|---|-----------------|--------|
| E (e)   | = | -961.8140800790 |        |
| ZPE     | = | 0.026215        |        |
|         | = | 68.827679       | kJ/mol |
| E (298) | = | -961.780593     |        |
| H (298) | = | -961.779649     |        |
| G (298) | = | -961.820534     |        |

---

### **BrOTf Cs SCRF DFT**

Charge = 0 Multiplicity = 1

|    |           |           |           |
|----|-----------|-----------|-----------|
| S  | 0.753084  | -0.345152 | 0.000000  |
| C  | 1.469507  | 1.424580  | 0.000000  |
| O  | -0.799885 | 0.199273  | 0.000000  |
| F  | 2.790943  | 1.296432  | 0.000000  |
| F  | 1.076880  | 2.068708  | 1.086958  |
| F  | 1.076880  | 2.068708  | -1.086958 |
| O  | 1.076880  | -0.977480 | 1.262020  |
| O  | 1.076880  | -0.977480 | -1.262020 |
| Br | -2.177135 | -1.082405 | 0.000000  |

  

|         |   |                 |        |
|---------|---|-----------------|--------|
| E (e)   | = | -974.7286406070 |        |
| ZPE     | = | 0.027086        |        |
|         | = | 71.113858       | kJ/mol |
| E (298) | = | -974.692114     |        |
| H (298) | = | -974.691169     |        |
| G (298) | = | -974.739765     |        |

---

### IOTf Cs SCRf DFT

Charge = 0 Multiplicity = 1

|   |           |           |           |
|---|-----------|-----------|-----------|
| S | 1.126947  | -0.153104 | 0.000000  |
| C | 1.854963  | 1.604171  | 0.000000  |
| O | -0.406530 | 0.358601  | 0.000000  |
| F | 3.177999  | 1.472259  | 0.000000  |
| F | 1.469292  | 2.256748  | 1.086966  |
| F | 1.469292  | 2.256748  | -1.086966 |
| O | 1.469292  | -0.783311 | 1.260619  |
| O | 1.469292  | -0.783311 | -1.260619 |
| I | -1.971068 | -0.969490 | 0.000000  |

  

|        |   |                 |        |
|--------|---|-----------------|--------|
| E(e)   | = | -972.9666481320 |        |
| ZPE    | = | 0.027043        |        |
|        | = | 71.000137       | kJ/mol |
| E(298) | = | -972.930123     |        |
| H(298) | = | -972.929179     |        |
| G(298) | = | -972.978516     |        |

---

### HOTf C1 SCRf DFT

Charge = 0 Multiplicity = 1

|   |           |           |           |
|---|-----------|-----------|-----------|
| S | -0.867610 | -0.141546 | 0.046766  |
| C | 1.018475  | 0.008743  | -0.002440 |
| O | -1.283584 | 1.265480  | -0.604480 |
| F | 1.542080  | -1.092635 | 0.527243  |
| F | 1.398619  | 1.069452  | 0.705451  |
| F | 1.427795  | 0.139927  | -1.258916 |
| O | -1.253290 | -0.207044 | 1.442450  |
| O | -1.237008 | -1.160537 | -0.909633 |
| H | -1.354481 | 1.978398  | 0.075695  |

  

|        |   |                 |        |
|--------|---|-----------------|--------|
| E(e)   | = | -962.2303614940 |        |
| ZPE    | = | 0.036911        |        |
|        | = | 96.910477       | kJ/mol |
| E(298) | = | -962.185505     |        |
| H(298) | = | -962.184560     |        |
| G(298) | = | -962.227177     |        |

---

### HOTf Cs SCRf DFT

Charge = 0 Multiplicity = 1

|   |           |           |           |
|---|-----------|-----------|-----------|
| S | -0.273679 | -0.837104 | 0.000000  |
| C | 0.457166  | 0.908601  | 0.000000  |
| O | -1.801479 | -0.334510 | 0.000000  |
| F | 1.781600  | 0.780307  | 0.000000  |
| F | 0.071972  | 1.565945  | 1.086846  |
| F | 0.071972  | 1.565945  | -1.086846 |
| O | 0.071972  | -1.468568 | 1.259735  |
| O | 0.071972  | -1.468568 | -1.259735 |
| H | -2.433750 | -1.094544 | 0.000000  |

  

|        |   |                 |        |
|--------|---|-----------------|--------|
| E(e)   | = | -962.2279368350 |        |
| ZPE    | = | 0.036129        |        |
|        | = | 94.857012       | kJ/mol |
| E(298) | = | -962.184329     |        |
| H(298) | = | -962.183385     |        |
| G(298) | = | -962.224826     |        |

Frequencies:  
A" -130.8856

### 3.2.2. Dichloromethane

---

#### pyridine C2v SCRF DFT

Charge = 0 Multiplicity = 1

|   |          |           |           |
|---|----------|-----------|-----------|
| N | 0.000000 | 0.000000  | 1.417467  |
| C | 0.000000 | 1.144215  | 0.720587  |
| C | 0.000000 | 1.197075  | -0.671414 |
| C | 0.000000 | 0.000000  | -1.382101 |
| C | 0.000000 | -1.197075 | -0.671414 |
| C | 0.000000 | -1.144215 | 0.720587  |
| H | 0.000000 | 2.061206  | 1.304259  |
| H | 0.000000 | 2.154393  | -1.180533 |
| H | 0.000000 | 0.000000  | -2.467197 |
| H | 0.000000 | -2.154393 | -1.180533 |
| H | 0.000000 | -2.061206 | 1.304259  |

  

|        |   |                 |        |
|--------|---|-----------------|--------|
| E(e)   | = | -248.3548683070 |        |
| ZPE    | = | 0.088293        |        |
|        | = | 231.813516      | kJ/mol |
| E(298) | = | -248.262296     |        |
| H(298) | = | -248.261352     |        |
| G(298) | = | -248.293322     |        |

---

#### 1 D2d SCRF DFT

Charge = 1 Multiplicity = 1

|    |           |           |           |
|----|-----------|-----------|-----------|
| Br | 0.000000  | 0.000000  | 0.000000  |
| N  | 0.000000  | 0.000000  | 2.139530  |
| C  | 0.000000  | 1.168333  | 2.799603  |
| C  | 0.000000  | 1.201910  | 4.185950  |
| C  | 0.000000  | 0.000000  | 4.889670  |
| C  | 0.000000  | -1.201910 | 4.185950  |
| C  | 0.000000  | -1.168333 | 2.799603  |
| N  | 0.000000  | 0.000000  | -2.139530 |
| C  | 1.168333  | 0.000000  | -2.799603 |
| C  | 1.201910  | 0.000000  | -4.185950 |
| C  | 0.000000  | 0.000000  | -4.889670 |
| C  | -1.201910 | 0.000000  | -4.185950 |
| C  | -1.168333 | 0.000000  | -2.799603 |
| H  | 0.000000  | 2.069266  | 2.196490  |
| H  | 0.000000  | 2.157615  | 4.696386  |
| H  | 0.000000  | 0.000000  | 5.974275  |
| H  | 0.000000  | -2.157615 | 4.696386  |
| H  | 0.000000  | -2.069266 | 2.196490  |
| H  | 2.069266  | 0.000000  | -2.196490 |
| H  | 2.157615  | 0.000000  | -4.696386 |
| H  | 0.000000  | 0.000000  | -5.974275 |
| H  | -2.157615 | 0.000000  | -4.696386 |
| H  | -2.069266 | 0.000000  | -2.196490 |

  

|        |   |                 |        |
|--------|---|-----------------|--------|
| E(e)   | = | -509.6998061030 |        |
| ZPE    | = | 0.180505        |        |
|        | = | 473.914484      | kJ/mol |
| E(298) | = | -509.507503     |        |
| H(298) | = | -509.506559     |        |
| G(298) | = | -509.560786     |        |

Frequencies:

|    |              |
|----|--------------|
| B1 | 3.4691       |
| B2 | 164.8693 (a) |
| A1 | 173.1980 (s) |

---

## 1 D2h SCRF DFT

Charge = 1 Multiplicity = 1

|    |          |           |           |
|----|----------|-----------|-----------|
| Br | 0.000000 | 0.000000  | 0.000000  |
| N  | 0.000000 | 0.000000  | 2.139191  |
| C  | 0.000000 | 1.168206  | 2.799298  |
| C  | 0.000000 | 1.201864  | 4.185614  |
| C  | 0.000000 | 0.000000  | 4.889388  |
| C  | 0.000000 | -1.201864 | 4.185614  |
| C  | 0.000000 | -1.168206 | 2.799298  |
| N  | 0.000000 | 0.000000  | -2.139191 |
| C  | 0.000000 | -1.168206 | -2.799298 |
| C  | 0.000000 | -1.201864 | -4.185614 |
| C  | 0.000000 | 0.000000  | -4.889388 |
| C  | 0.000000 | 1.201864  | -4.185614 |
| C  | 0.000000 | 1.168206  | -2.799298 |
| H  | 0.000000 | 2.069226  | 2.196287  |
| H  | 0.000000 | 2.157582  | 4.696020  |
| H  | 0.000000 | 0.000000  | 5.973984  |
| H  | 0.000000 | -2.157582 | 4.696020  |
| H  | 0.000000 | -2.069226 | 2.196287  |
| H  | 0.000000 | -2.069226 | -2.196287 |
| H  | 0.000000 | -2.157582 | -4.696020 |
| H  | 0.000000 | 0.000000  | -5.973984 |
| H  | 0.000000 | 2.157582  | -4.696020 |
| H  | 0.000000 | 2.069226  | -2.196287 |

E (e) = -509.6997020410  
ZPE = 0.180480  
= 473.849297 kJ/mol  
E (298) = -509.507413  
H (298) = -509.506469  
G (298) = -509.561678

### Frequencies:

|     |              |
|-----|--------------|
| AU  | 1.2428       |
| B1U | 164.8975 (a) |
| AG  | 172.8800 (s) |

---

## 2 D2 SCRF DFT

Charge = 1 Multiplicity = 1

|    |           |           |           |
|----|-----------|-----------|-----------|
| N  | 0.000000  | 0.000000  | 2.140010  |
| C  | 0.000000  | 1.168267  | 2.799639  |
| C  | 0.000408  | 1.201922  | 4.185997  |
| C  | 0.000000  | 0.000000  | 4.889663  |
| C  | -0.000408 | -1.201922 | 4.185997  |
| C  | 0.000000  | -1.168267 | 2.799639  |
| H  | -0.001143 | 2.068906  | 2.196198  |
| H  | 0.000358  | 2.157705  | 4.696269  |
| H  | 0.000000  | 0.000000  | 5.974234  |
| H  | -0.000358 | -2.157705 | 4.696269  |
| H  | 0.001143  | -2.068906 | 2.196198  |
| Br | 0.000000  | 0.000000  | 0.000196  |
| N  | 0.000000  | 0.000000  | -2.139589 |
| C  | 0.873848  | 0.775373  | -2.799876 |
| C  | 0.898598  | 0.797889  | -4.186194 |
| C  | 0.000000  | 0.000000  | -4.889961 |
| C  | -0.898598 | -0.797889 | -4.186194 |
| C  | -0.873848 | -0.775373 | -2.799876 |
| H  | 1.548192  | 1.373287  | -2.197213 |
| H  | 1.613283  | 1.432491  | -4.696527 |
| H  | 0.000000  | 0.000000  | -5.974524 |
| H  | -1.613283 | -1.432491 | -4.696527 |
| H  | -1.548192 | -1.373287 | -2.197213 |

E (e) = -509.6997498610  
ZPE = 0.180538  
= 474.001887 kJ/mol  
E (298) = -509.507436  
H (298) = -509.506491  
G (298) = -509.559904

### Frequencies:

|   |              |
|---|--------------|
| B | 146.7364 (a) |
| A | 164.5953 (s) |

---

## 2 D2d SCRF DFT

Charge = 1    Multiplicity = 1

|   |           |           |           |
|---|-----------|-----------|-----------|
| I | 0.000000  | 0.000000  | 0.000000  |
| N | 0.000000  | 0.000000  | 2.302432  |
| C | 0.000000  | 1.166491  | 2.971000  |
| C | 0.000000  | 1.200887  | 4.357022  |
| C | 0.000000  | 0.000000  | 5.061888  |
| C | 0.000000  | -1.200887 | 4.357022  |
| C | 0.000000  | -1.166491 | 2.971000  |
| N | 0.000000  | 0.000000  | -2.302432 |
| C | 1.166491  | 0.000000  | -2.971000 |
| C | 1.200887  | 0.000000  | -4.357022 |
| C | 0.000000  | 0.000000  | -5.061888 |
| C | -1.200887 | 0.000000  | -4.357022 |
| C | -1.166491 | 0.000000  | -2.971000 |
| H | 0.000000  | 2.071444  | 2.373956  |
| H | 0.000000  | 2.157146  | 4.866454  |
| H | 0.000000  | 0.000000  | 6.146495  |
| H | 0.000000  | -2.157146 | 4.866454  |
| H | 0.000000  | -2.071444 | 2.373956  |
| H | 2.071444  | 0.000000  | -2.373956 |
| H | 2.157146  | 0.000000  | -4.866454 |
| H | 0.000000  | 0.000000  | -6.146495 |
| H | -2.157146 | 0.000000  | -4.866454 |
| H | -2.071444 | 0.000000  | -2.373956 |

E (e) = -507.9337813400  
ZPE = 0.180198  
= 473.109566    kJ/mol  
E (298) = -507.742524  
H (298) = -507.741580  
G (298) = -507.792266

Frequencies:  
B1 -22.3086  
B2 162.1558 (a)  
A1 164.7295 (s)

---

## 2 D2h SCRF DFT

Charge = 1    Multiplicity = 1

|   |          |           |           |
|---|----------|-----------|-----------|
| I | 0.000000 | 0.000000  | 0.000000  |
| N | 0.000000 | 0.000000  | 2.301933  |
| C | 0.000000 | 1.166394  | 2.970495  |
| C | 0.000000 | 1.200853  | 4.356488  |
| C | 0.000000 | 0.000000  | 5.061406  |
| C | 0.000000 | -1.200853 | 4.356488  |
| C | 0.000000 | -1.166394 | 2.970495  |
| N | 0.000000 | 0.000000  | -2.301933 |
| C | 0.000000 | -1.166394 | -2.970495 |
| C | 0.000000 | -1.200853 | -4.356488 |
| C | 0.000000 | 0.000000  | -5.061406 |
| C | 0.000000 | 1.200853  | -4.356488 |
| C | 0.000000 | 1.166394  | -2.970495 |
| H | 0.000000 | 2.071416  | 2.373532  |
| H | 0.000000 | 2.157130  | 4.865885  |
| H | 0.000000 | 0.000000  | 6.146005  |
| H | 0.000000 | -2.157130 | 4.865885  |
| H | 0.000000 | -2.071416 | 2.373532  |
| H | 0.000000 | -2.071416 | -2.373532 |
| H | 0.000000 | -2.157130 | -4.865885 |
| H | 0.000000 | 0.000000  | -6.146005 |
| H | 0.000000 | 2.157130  | -4.865885 |
| H | 0.000000 | 2.071416  | -2.373532 |

E (e) = -507.9337230510  
ZPE = 0.180187  
= 473.080947    kJ/mol  
E (298) = -507.742473  
H (298) = -507.741529  
G (298) = -507.792227

Frequencies:  
AU -23.3495



B1U 162.2789 (a)  
AG 164.5005 (s)

### 3 C2v twisted SCRf DFT

Charge = 1 Multiplicity = 1

|   |           |           |           |
|---|-----------|-----------|-----------|
| H | 0.000000  | 0.000000  | 0.295007  |
| N | 0.000000  | 0.000000  | 1.379317  |
| C | 0.000000  | 1.176840  | 2.029673  |
| C | 0.000000  | 1.206470  | 3.412491  |
| C | 0.000000  | 0.000000  | 4.111525  |
| C | 0.000000  | -1.206470 | 3.412491  |
| C | 0.000000  | -1.176840 | 2.029673  |
| N | 0.000000  | 0.000000  | -1.351256 |
| C | 1.153611  | 0.000000  | -2.037245 |
| C | 1.199525  | 0.000000  | -3.426051 |
| C | 0.000000  | 0.000000  | -4.133293 |
| C | -1.199525 | 0.000000  | -3.426051 |
| C | -1.153611 | 0.000000  | -2.037245 |
| H | 0.000000  | 2.068051  | 1.412613  |
| H | 0.000000  | 2.158576  | 3.928733  |
| H | 0.000000  | 0.000000  | 5.196327  |
| H | 0.000000  | -2.158576 | 3.928733  |
| H | 0.000000  | -2.068051 | 1.412613  |
| H | 2.065681  | 0.000000  | -1.447497 |
| H | 2.155499  | 0.000000  | -3.936564 |
| H | 0.000000  | 0.000000  | -5.218132 |
| H | -2.155499 | 0.000000  | -3.936564 |
| H | -2.065681 | 0.000000  | -1.447497 |

E (e) = -497.1684564410  
ZPE = 0.190633  
= 500.507067 kJ/mol  
E (298) = -496.967449  
H (298) = -496.966505  
G (298) = -497.016190

Frequencies:  
A1 131.8475  
A1 610.2048

### 3 C2v planar SCRf DFT

Charge = 1 Multiplicity = 1

|   |          |           |           |
|---|----------|-----------|-----------|
| H | 0.000000 | 0.000000  | 0.314183  |
| N | 0.000000 | 0.000000  | 1.392700  |
| C | 0.000000 | 1.176707  | 2.044308  |
| C | 0.000000 | 1.206070  | 3.426908  |
| C | 0.000000 | 0.000000  | 4.126247  |
| C | 0.000000 | -1.206070 | 3.426908  |
| C | 0.000000 | -1.176707 | 2.044308  |
| N | 0.000000 | 0.000000  | -1.363321 |
| C | 0.000000 | -1.152093 | -2.052413 |
| C | 0.000000 | -1.198741 | -3.441271 |
| C | 0.000000 | 0.000000  | -4.149283 |
| C | 0.000000 | 1.198741  | -3.441271 |
| C | 0.000000 | 1.152093  | -2.052413 |
| H | 0.000000 | 2.069853  | 1.430720  |
| H | 0.000000 | 2.158396  | 3.942715  |
| H | 0.000000 | 0.000000  | 5.211043  |
| H | 0.000000 | -2.158396 | 3.942715  |
| H | 0.000000 | -2.069853 | 1.430720  |
| H | 0.000000 | -2.066776 | -1.466940 |
| H | 0.000000 | -2.155159 | -3.950959 |
| H | 0.000000 | 0.000000  | -5.234111 |
| H | 0.000000 | 2.155159  | -3.950959 |
| H | 0.000000 | 2.066776  | -1.466940 |

E (e) = -497.1667097120  
ZPE = 0.190864  
= 501.111781 kJ/mol  
E (298) = -496.966477  
H (298) = -496.965533  
G (298) = -497.011624

Frequencies:

A1 169.6880  
A1 610.6769

---

### **OTf-Cs SCRF DFT**

Charge = -1 Multiplicity = 1

|   |           |           |           |
|---|-----------|-----------|-----------|
| S | -0.410982 | -0.826133 | 0.000000  |
| C | 0.429764  | 0.862811  | 0.000000  |
| O | -1.847843 | -0.483459 | 0.000000  |
| F | 1.769430  | 0.739655  | 0.000000  |
| F | 0.083970  | 1.576850  | 1.086417  |
| F | 0.083970  | 1.576850  | -1.086417 |
| O | 0.083970  | -1.445705 | 1.246079  |
| O | 0.083970  | -1.445705 | -1.246079 |

E(e) = -961.8065028330  
ZPE = 0.026252  
= 68.925166 kJ/mol  
E(298) = -961.772978  
H(298) = -961.772034  
G(298) = -961.812923

---

### **BrOTf Cs SCRF DFT**

Charge = 0 Multiplicity = 1

|    |           |           |           |
|----|-----------|-----------|-----------|
| S  | 0.753217  | -0.346234 | 0.000000  |
| C  | 1.468711  | 1.423849  | 0.000000  |
| O  | -0.799946 | 0.199640  | 0.000000  |
| F  | 2.790292  | 1.296317  | 0.000000  |
| F  | 1.076620  | 2.068505  | 1.086953  |
| F  | 1.076620  | 2.068505  | -1.086953 |
| O  | 1.076620  | -0.977215 | 1.262533  |
| O  | 1.076620  | -0.977215 | -1.262533 |
| Br | -2.176625 | -1.081857 | 0.000000  |

E(e) = -974.7278116170  
ZPE = 0.027158  
= 71.303226 kJ/mol  
E(298) = -974.691226  
H(298) = -974.690282  
G(298) = -974.738845

---

### **IOTf Cs SCRF DFT**

Charge = 0 Multiplicity = 1

|   |           |           |           |
|---|-----------|-----------|-----------|
| S | 1.126947  | -0.153104 | 0.000000  |
| C | 1.854963  | 1.604171  | 0.000000  |
| O | -0.406530 | 0.358601  | 0.000000  |
| F | 3.177999  | 1.472259  | 0.000000  |
| F | 1.469292  | 2.256748  | 1.086966  |
| F | 1.469292  | 2.256748  | -1.086966 |
| O | 1.469292  | -0.783311 | 1.260619  |
| O | 1.469292  | -0.783311 | -1.260619 |
| I | -1.971068 | -0.969490 | 0.000000  |

E(e) = -972.9666481320  
ZPE = 0.027043  
= 71.000137 kJ/mol  
E(298) = -972.930123  
H(298) = -972.929179  
G(298) = -972.978516

---

### **HOTf C1 SCRF DFT**

Charge = 0 Multiplicity = 1

|   |           |           |           |
|---|-----------|-----------|-----------|
| S | -0.867617 | -0.143175 | 0.051103  |
| C | 1.018136  | 0.007292  | -0.002977 |
| O | -1.279157 | 1.245784  | -0.648546 |
| F | 1.544389  | -1.072960 | 0.564844  |
| F | 1.394430  | 1.093706  | 0.669162  |
| F | 1.428764  | 0.097581  | -1.262252 |
| O | -1.253661 | -0.151699 | 1.448041  |

|         |           |           |                 |        |
|---------|-----------|-----------|-----------------|--------|
| O       | -1.238520 | -1.192884 | -0.869031       |        |
| H       | -1.364480 | 1.972495  | 0.010712        |        |
| E (e)   | =         |           | -962.2282615740 |        |
| ZPE     | =         |           | 0.037153        |        |
|         | =         |           | 97.543810       | kJ/mol |
| E (298) | =         |           | -962.183210     |        |
| H (298) | =         |           | -962.182266     |        |
| G (298) | =         |           | -962.224416     |        |

---

### HOTf Cs SCRF DFT

Charge = 0 Multiplicity = 1

|         |           |           |                 |        |
|---------|-----------|-----------|-----------------|--------|
| S       | -0.271059 | -0.837771 | 0.000000        |        |
| C       | 0.457213  | 0.909313  | 0.000000        |        |
| O       | -1.802291 | -0.334673 | 0.000000        |        |
| F       | 1.781631  | 0.782047  | 0.000000        |        |
| F       | 0.070847  | 1.565509  | 1.086889        |        |
| F       | 0.070847  | 1.565509  | -1.086889       |        |
| O       | 0.070847  | -1.468685 | 1.260258        |        |
| O       | 0.070847  | -1.468685 | -1.260258       |        |
| H       | -2.431479 | -1.092779 | 0.000000        |        |
| E (e)   | =         |           | -962.2258136930 |        |
| ZPE     | =         |           | 0.036320        |        |
|         | =         |           | 95.357628       | kJ/mol |
| E (298) | =         |           | -962.182011     |        |
| H (298) | =         |           | -962.181066     |        |
| G (298) | =         |           | -962.222553     |        |

Frequencies:  
A" -158.3285
